## **Strategy-dependent effects of working-memory limitations on human perceptual decision-making**

Kyra Schapiro<sup>1</sup>, Krešimir Josić<sup>2,3</sup>, Zachary P. Kilpatrick<sup>4,5</sup>, and Joshua I. Gold<sup>1</sup>

<sup>1</sup>Department of Neuroscience, University of Pennsylvania, Philadelphia, PA, USA

<sup>2</sup>Department of Mathematics, University of Houston, Houston, TX, USA

<sup>3</sup>Department of Biology and Biochemistry, University of Houston, Houston, TX, USA

<sup>4</sup>Department of Applied Mathematics, University of Colorado Boulder, Boulder, CO, USA

<sup>5</sup>Institute of Cognitive Science, University of Colorado Boulder, Boulder, CO, USA

## 1 **Abstract**

2           Deliberative decisions based on an accumulation of evidence over time depend on working  
3 memory, and working memory has limitations, but how these limitations affect deliberative decision-  
4 making is not understood. We used human psychophysics to assess the impact of working-memory  
5 limitations on the fidelity of a continuous decision variable. Participants decided the average location of  
6 multiple visual targets. This computed, continuous decision variable degraded with time and capacity in  
7 a manner that depended critically on the strategy used to form the decision variable. This dependence  
8 reflected whether the decision variable was computed either: 1) immediately upon observing the  
9 evidence, and thus stored as a single value in memory; or 2) at the time of the report, and thus stored as  
10 multiple values in memory. These results provide important constraints on how the brain computes and  
11 maintains temporally dynamic decision variables.

## 12 **Introduction**

13 Many perceptual, memory-based, and reward-based decisions depend on an accumulation of  
14 evidence over time (Brody & Hanks, 2016; Gold & Shadlen, 2007; Ratcliff et al., 2016; Shadlen &  
15 Shohamy, 2016; Summerfield & Tsetsos, 2012). This dynamic process, which can operate on timescales  
16 ranging from tens to hundreds of milliseconds for many perceptual decisions to seconds or longer for  
17 reward-based decisions (Bernacchia et al., 2011; Gold & Stocker, 2017), depends on working memory  
18 to maintain representations of new, incoming evidence and/or the aggregated, updating decision variable.  
19 Working memory is known to be constrained by capacity and temporal limitations (Bastos et al., 2018;  
20 Cowan et al., 2008; Funahashi et al., 1989; Oberauer et al., 2016; Panichello et al., 2019; Ploner et al.,  
21 1998; Schneegans & Bays, 2018; White et al., 1994), which implies such limitations may also constrain  
22 decision performance when the decision requires information to be maintained in working memory.  
23 Several previous studies failed to identify such constraints on working-memory-dependent decisions but  
24 used tasks involving binary choices, which may have a low sensitivity to known working-memory  
25 limitations (Liu et al., 2015; Waskom & Kiani, 2018). It remains unclear how working-memory  
26 limitations affect decisions that require interpreting and storing continuously valued quantities,  
27 representations of which are known to degrade in working-memory (Ploner et al., 1998; Schneegans &  
28 Bays, 2018; Wei et al., 2012; White et al., 1994).

29 To assess such effects, we examined the relationship between decision-making and working  
30 memory in the context of visuo-spatial tasks about continuous variables (visual target locations) that are  
31 sensitive to capacity and temporal limitations of working memory (Bastos et al., 2018; Funahashi et al.,  
32 1989; Panichello et al., 2019; Ploner et al., 1998; Schneegans & Bays, 2018; White et al., 1994).  
33 Specifically, we required human participants to indicate a spatial location that was informed by one or  
34 more briefly presented visual stimuli (“disks”; Fig. 1) after a variable delay. We compared the effects of  
35 variable set size and delay when the remembered location corresponded to either: 1) the perceived

36 location (angle) of a specific disk, identified at the time of interrogation (comparable to prior studies  
37 (Ploner et al., 1998; Schneegans & Bays, 2018; Wei et al., 2012; White et al., 1994)); or 2) the computed  
38 mean angle of a set of multiple disks, which has not been examined in detail. Additionally, we examined  
39 the effects of working-memory limitations on computed locations under two conditions that are  
40 representative of certain decision-making tasks. The first was a “simultaneous” condition in which all  
41 disks (and thus all information) were presented at once. The second was a “sequential” condition in which  
42 one disk was presented later than the others. This condition required participants to adjust to a within-  
43 trial change of available decision-relevant information, typifying decisions that require evidence  
44 accumulation over time.

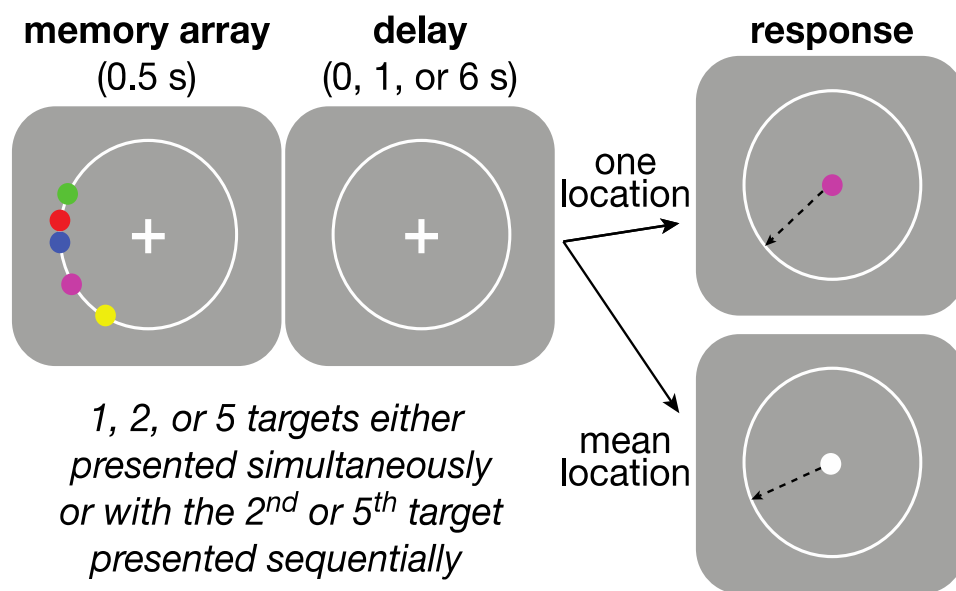

**Figure 1:** Behavioral task. Participants were asked to maintain visual fixation on the center cross while an array of colored disks was presented for 0.5 s, followed by a variable delay and finally the presentation of a visual cue that had a color that was either: 1) the same as one of the disks, indicating that the participant should use the mouse to mark the remembered location of that disk (“perceptual” trial) or 2) white, indicating that the participant should mark the mean angle of the array (“computed” trial). Perceptual and Computed trials were separated by blocks. Participants knew in advance which block they were performing, but not which disk would be probed on any given trial, during Perceptual blocks. The number of disks and length of the delay period were varied randomly within each block. Blocks were also defined by the temporal presentation of the disks. In “simultaneous” blocks all disks were presented at once, whereas in “sequential” blocks, the final disk (most counterclockwise) was presented midway through the variable delay.

45 For spatial working-memory tasks, the precision of working memory for perceived spatial  
46 locations is often well described by diffusion dynamics (Compte, 2000; Kilpatrick, 2018; Kilpatrick et  
47 al., 2013; Laing & Chow, 2001) that are commonly implemented in “bump-attractor” models of working  
48 memory (Compte, 2000; Constantinidis et al., 2018; Laing & Chow, 2001; Riley & Constantinidis, 2015;  
49 Wei et al., 2012; Wimmer et al., 2014) (Fig. 2a). Our analyses built on this framework by examining  
50 memory diffusion dynamics for the different task conditions and potential decision strategies. For the  
51 conditions we tested, most participants behavior was well fit by one of two strategies, each with its own  
52 constraints on decision performance based on different working-memory demands. The first strategy was  
53 to compute the decision variable (mean disk angle) immediately upon observing the evidence (individual  
54 disk angles), and then store that value in working memory in a manner that, like for the memory of a  
55 single perceived angle, could be modeled as a single particle with a particular diffusion constant  
56 (Average-then-Diffuse model; AtD; Fig. 2b parallel purple and solid black lines). The second strategy  
57 was to maintain the representations of all disk locations in working memory, modeled as separate  
58 diffusing particles, and then to combine them into a decision variable only at the time of the decision  
59 (Diffuse-then-Average model; DtA). Such strategy use results in a diffusion constant for the average that  
60 is inversely related to the number of points (Fig. 2b; magenta and dashed black lines). These two  
61 strategies had slightly different predictions and formulations when samples were presented sequentially  
62 (Fig. 2c,d). Our results show that like perceived angles, memory for computed mean angles degraded  
63 with increased set size (of relevant information) and delay between presentation and report. However,  
64 the degree of degradation depended strongly on the strategy used to compute the decision variables,  
65 implying that multiple, strategy- and task-dependent effects of working-memory should be considered in  
66 the construction of future neural and computational models of decision-making.

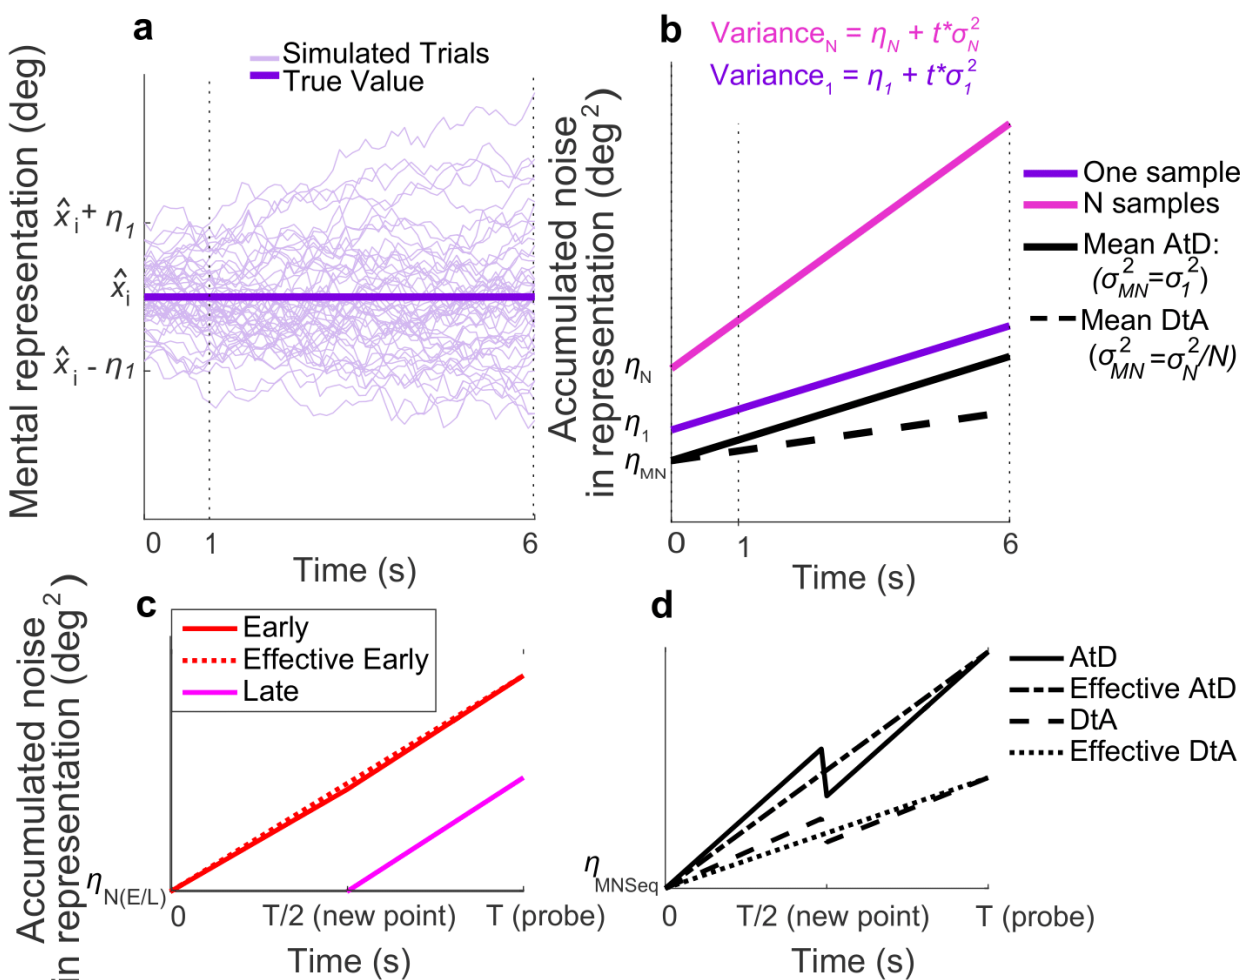

**Figure 2:** Diffusion model and predictions for different strategies. **a)** 50 simulated trials of the modeled representation of a single memorandum,  $\hat{x}_i$ , experiencing Brownian diffusion. At time  $t$ , the report,  $r_{b,t}$ , is the location of the particle (motor noise is included in  $\eta_t$ ). Note the increase in variance over time, which corresponds to decreased memory precision. **b)** Linear accumulation of noise (variance) for single or multiple perceived items (colors as indicated) or computed mean values using two different strategies. In each case, the memory representation starts with some initial, additive error,  $\eta_N$ , and diffuses over time with a diffusion constant  $\sigma_N^2$ , where  $N$  indicates set size. For the Average-then-Diffuse (AtD) model, the average over the presented stimuli is calculated immediately, and this single value is stored. Thus, the diffusion constant is identical between a Perceived and a Computed item (parallel purple and black lines), though the encoding may be different (i.e., the initial errors,  $\eta_1$  and  $\eta_{MN}$ , may not be equal). For the Diffuse-then-Average (DtA) model, all items are stored until the probe time. Thus, the diffusion constant of the Computed item is  $1/N^{\text{th}}$  the diffusion constant of the multiple Perceived items held in memory. **c)** Accumulation of noise for Perceived items presented sequentially. Note that when the new point is added at time  $T/2$ , the diffusion constant for previously presented items (Early) changes slightly because of the increased load. The “effective Early” trace shows the net gain in variance over time that would be expected when sampling the error only at time  $T$ , as was done in this study. **d)** Accumulation of noise for Computed items under sequential presentation conditions for both models. At time  $T/2$ , the final point is averaged, causing a change in the diffusion coefficients. The effective lines represent the measured change in variance over time one would measure when recording only at time  $T$ , as we did. In these examples  $N=5$ ,  $A=0.5$ .

## 67 **Results**

68           We measured the ability of human participants to remember spatial angles as a function of set  
69 size (1, 2, or 5 items), delay duration (0, 1, or 6 s), and task context (Perceived or Computed blocks). We  
70 measured error between reported and probed angles as a proxy for working memory-representations and  
71 inferred rates of memory degradation (diffusion constants) from the increase in variance of these errors  
72 over time. Below we first describe results from Simultaneous conditions, in which all items were  
73 presented simultaneously at the beginning of each trial, and show how capacity and temporal constraints  
74 on working memory relate to the accuracy of computed decision variables. We then describe our findings  
75 from Sequential conditions, in which one item was presented after the others in each trial, and show how  
76 capacity and temporal constraints affect the process of evidence integration over time.

### 77 Simultaneous condition behavior

78           The difference in reports of Perceived spatial angles and the true probed location (i.e., the  
79 response error) tended to be relatively unbiased in that the mean error across participants was not  
80 significantly different from zero (Fig. 3a, full distributions in Fig. S1, individual participant mean errors  
81 in Fig. S3-4). However, the variance of these errors increased roughly linearly over time (Fig. 3c),  
82 consistent with predictions of particle diffusion models (Compte, 2000; Kilpatrick, 2018; Kilpatrick et  
83 al., 2013; Laing & Chow, 2001). This error variance also depended systematically on set size (Fig. 3c).  
84 However the change in error variance over time (slope of variance increase) did not depend on set size  
85 (ANOVA, significant effect of set size,  $F(2,32)=83.87$ ,  $p=1.88e-13$ , and delay,  $F(2,32)=29.55$ ,  $p=5.37e-$   
86  $08$ , but no significant interaction between set size and delay,  $F(4,64)=1.36$ ,  $p=0.256$ ).

87           Errors in reports of Computed (i.e., inferred mean) spatial angles relative to true mean angles  
88 showed similar trends, albeit with a much weaker dependence on the number of items. Specifically,  
89 Computed angle reports were also unbiased (mean error from the true value was not significantly  
90 different from zero; Fig. 3b, S1,S3-4) but degraded (became more variable) with a roughly linear increase

91 in variance over time (Fig. 3d). Error variance was higher at higher set sizes (set size 5 had higher  
92 variances), but the rate of degradation in accuracy did not depend on set size (ANOVA, significant effect  
93 of set size,  $F(2,32)=13.53$   $p=5.515e-5$ , and delay,  $F(2,32)=130.79$ ,  $p=4.441e-16$ , but not their interaction,  
94  $F(4,64)=0.538$ ,  $p=0.708$ ).

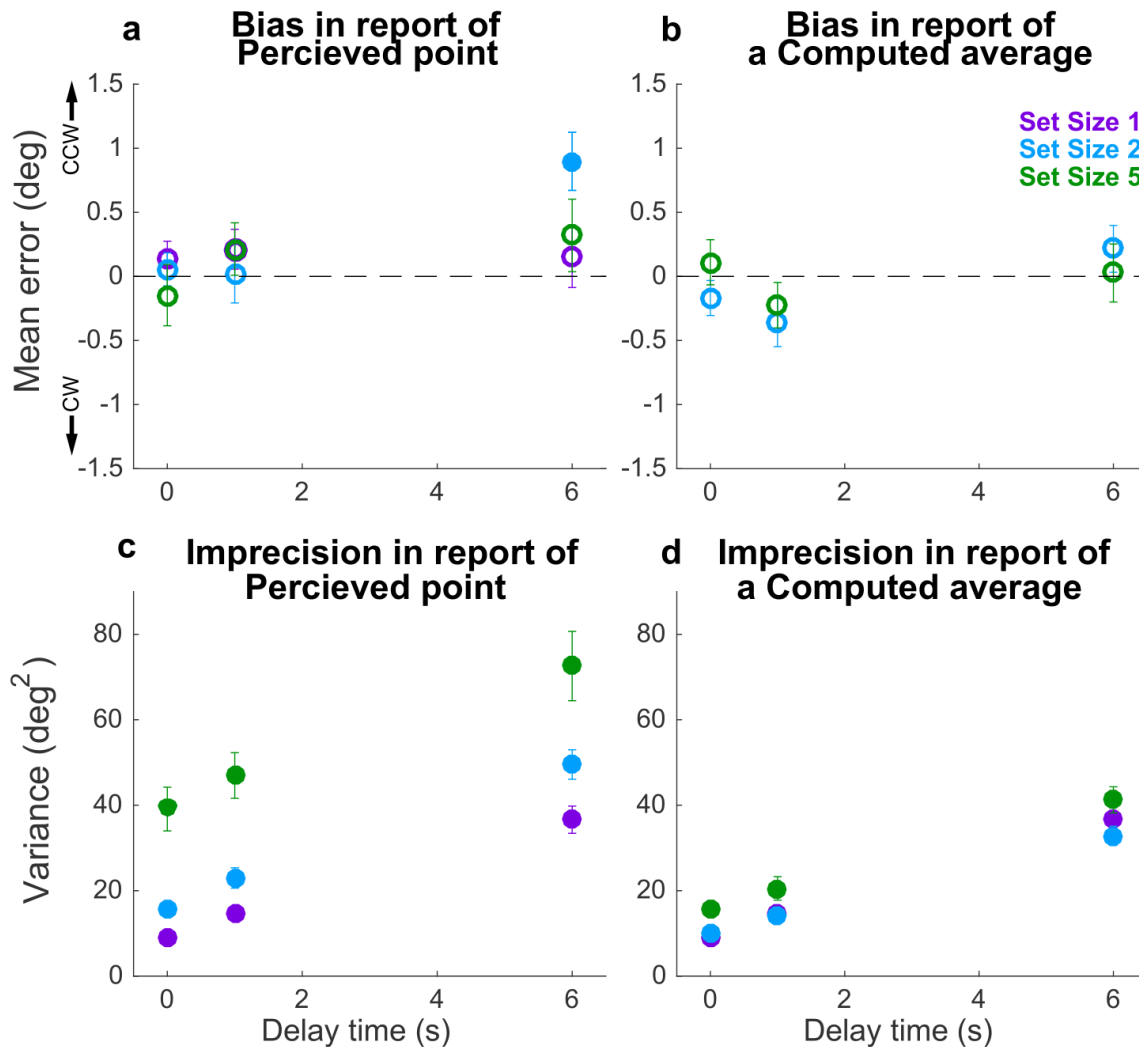

**Figure 3:** Behavioral summary for the Simultaneous condition. A) Mean Perceptual error for different set sizes (colors, as indicated) and delay time (abscissa). Filled points indicate two-tailed  $t$ -test for  $H_0$ : mean=0,  $p<0.05$ . B) Mean Computed (inferred mean) error for different set sizes (colors, as indicated) and delay time (abscissa); for all tests mean error was not significantly different from zero (open circles). C) Variance in Perceptual errors, plotted as in A. D) Variance in Computed (mean) errors, plotted as in B. In each panel, points and error bars are mean $\pm$ SEM across participants.



95 Simultaneous condition model fits

96 To better understand the effects of delay and set size on working-memory representations of  
 97 Perceived and Computed angles for individual participants, we fit the AtD and DtA models (see Methods  
 98 for details) separately to data from each condition and participant (Table 1; the two models each had the  
 99 same number of free parameters and thus were compared using the log-likelihoods of the fits). Both  
 100 models include terms that quantify separately the effect of set size on non-time-dependent noise (i.e., the  
 101 variance in report errors with no delay;  $\eta$ ) and the diffusion constant (i.e., the rate at which the variance  
 102 of the errors increases over time for a single Perceived point;  $\sigma_I^2$ ). The  $A$  parameter governs the  
 103 relationship between  $\sigma_I^2$  and the diffusion constant for multiple Perceived points ( $\sigma_N^2$ ) (i.e.,  $\sigma_N^2 = \sigma_I^2 * N^A$ ).

|            | <i>Set size (N)</i> | <i>Number best-fit participants</i> | $\eta_I$   | $\eta_N$    | $\eta_{MN}$ | $\sigma_I^2$ | $A$         |
|------------|---------------------|-------------------------------------|------------|-------------|-------------|--------------|-------------|
| <b>AtD</b> | 2                   | 8                                   | 10.79±1.45 | 16.49±2.67  | 9.39±1.07   | 4.85±0.44    | 0.0892±0.24 |
|            | 5                   | 14                                  | 9.80±1.18  | 36.88±5.33  | 14.79±1.50  | 4.34±0.47    | 0.0051±0.07 |
| <b>DtA</b> | 2                   | 9                                   | 8.22±1.35  | 14.16±3.13  | 10.45±2.09  | 3.67±0.58    | 0.61±0.22   |
|            | 5                   | 3                                   | 7.63±0.30  | 45.49±17.03 | 21.10±7.59  | 5.14±0.28    | 0.49±0.14   |

**Table 1.** Summary of model fits for the Simultaneous condition. Parameters are: 1)  $\eta_I$ , non-time-dependent noise of a single value; 2)  $\eta_N$ , non-time-dependent noise of  $N$  points; 3)  $\eta_{MN}$ , non-time-dependent noise of the mean of  $N$  points; 4)  $\sigma_I^2$ , diffusion constant of a single point; and 5)  $A$ , diffusion cost of additional points. For each parameter, the maximum likelihood estimates (mean over participants±SEM) are given for the participants best fit with a particular model.

104 For the participants best fit by the AtD model, the mean, best-fitting values of  $A$  were close to zero,  
 105 which reflects the lack of interaction between set size and delay seen in the Perceptual ANOVA in Fig. 3c  
 106 (because in this model,  $\sigma_N^2 = \sigma_I^2$  when  $A=0$ ). Conversely, for the participants best fit by the DtA model,  
 107 the mean, best-fitting values of  $A$  were slightly higher, which reflects the lack of interaction in the  
 108 Computed ANOVA in Fig. 3d (because in this model, the diffusion of a Computed point scales with  $\sigma_N^2$ ,  
 109 specifically  $\sigma_{MN}^2 = \sigma_N^2 / N$ ; thus,  $\sigma_{MN}^2$  does not differ from  $\sigma_I^2$  in DtA only when  $\sigma_N^2 > \sigma_I^2$ , which occurs  
 110 when  $A > 0$ ). Of note, when  $A=1$ , the AtD and DtA models make identical predictions, namely  $\sigma_{MN}^2 = \sigma_I^2 =$

111  $\sigma_I^2 * N^A / N = \hat{\sigma}_N^2 / N$ . Across the population, the 95% confidence intervals for  $A$  (as determined by the SEM  
112  $A$  values across the population) did not overlap with 1, supporting the distinguishability of the two models  
113 on average participants (although not for each individual participant; Fig. S7).

#### 114 Simultaneous condition model validation

115 When  $A$  differs from one, AtD and DtA make distinct, strong assumptions about the diffusion  
116 constant relationships between either single (AtD) or multiple (DtA) Perceived angles(s) versus a  
117 Computed average angle, as depicted in Fig. 2b. We used these assumptions to validate whether the  
118 better-fitting model and best-fit parameters for a given participant at a given set size were likely to  
119 produce the participant's behavior. Specifically, the AtD model assumes that the diffusion constant for a  
120 single Perceived angle and for a Computed average angle are the same because both involve the memory  
121 of a single value (eq. 9). In contrast, the DtA model assumes that the diffusion constant for a Computed  
122 average angle is  $1/N^{\text{th}}$  the diffusion constant for  $N$  points because all  $N$  points are held in memory prior  
123 to averaging (eq.10). We analyzed how consistent these assumptions were with the behavioral data (Fig.  
124 4). Specifically, for each participant we fit a line to the measured error variances as a function of delay  
125 for a given set size in both Perceived and Computed blocks to estimate the change in variance over time  
126 (the empirical diffusion constant estimates:  $\hat{\sigma}_I^2$ ,  $\hat{\sigma}_N^2$ ,  $\hat{\sigma}_{MN}^2$ , where  $N=2$  or  $5$  for the two set sizes). We then  
127 compared the differences of these empirical estimates to the differences predicted between diffusion  
128 constants by the best fit model for a given participant.

129 In general, the participant data conformed to the model predictions of the best-fit model for that  
130 participant, despite substantial individual variability. For participants whose data were best fit by the AtD  
131 model, empirical estimates of the diffusion constant ( $\hat{\sigma}_{MN}^2$ ) from Computed blocks tended to be similar  
132 to the empirical estimates of the diffusion constant for a single Perceptual point ( $\hat{\sigma}_I^2$ ; Fig. 4a,c).

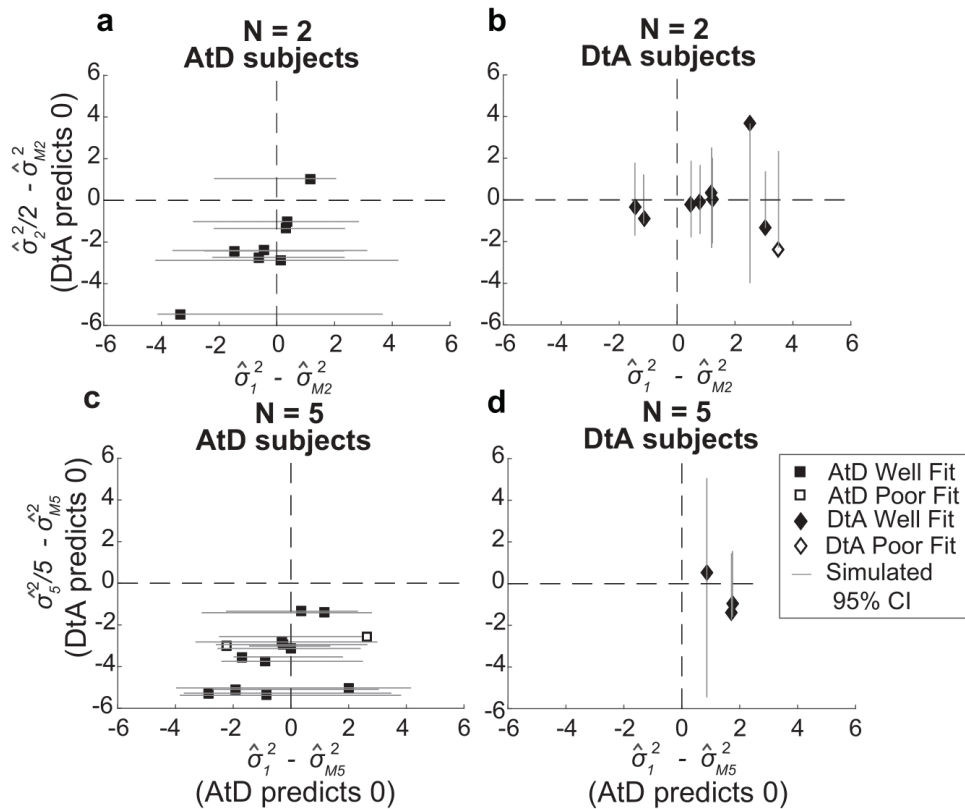

**Figure 4:** Comparisons of empirical and model-based diffusion constant relationships for the Simultaneous condition. In each panel, the abscissa shows the difference between: 1) empirical estimates of the diffusion constant for a Computed value measured by fitting a line to measured variance as a function of delay time for set size 2 ( $\hat{\sigma}_{M2}^2$ , **a,b**) or 5 ( $\hat{\sigma}_{M5}^2$ , **c,d**), and 2) the empirical estimates of the diffusion constant for a single Perceived value ( $\hat{\sigma}_1^2$ ). The Average-then-Diffuse (AtD) model predicts a difference of zero. The ordinate shows the difference between: 1) the empirical estimate of Computed diffusion constants  $\hat{\sigma}_{M2}^2$  or  $\hat{\sigma}_{M5}^2$ , and 2) the empirical estimates of the diffusion constant for multiple Perceived values ( $\hat{\sigma}_2^2$  or  $\hat{\sigma}_5^2$ ) divided by the number of points. The Diffuse-then-Average (DtA) model predicts a difference of zero. Each point was obtained using data from individual participants, separated by whether they were best fit by the AtD (**a,c**) or DtA (**b,d**) model for the given set-size condition. Lines represent 95% confidence intervals computed by simulating data using the best-fit parameters for the given fit and repeating the empirical estimate comparison procedure. Closed symbols indicate participants who fell within the 95% confidence interval for their best-fit model.

133 Specifically, for all but two participants, the empirical diffusion constant differences fell within the 95%  
 134 confidence interval of simulated distribution. Likewise, for participants whose data were best fit by the  
 135 DtA model, empirical estimates of the diffusion constant ( $\hat{\sigma}_{MN}^2$ ) from Computed blocks tended to be  
 136 similar to the empirical estimates of the diffusion constant for multiple Perceptual points divided by the  
 137 set size ( $\hat{\sigma}_N^2/N$ ; Fig. 4b,d). Specifically, for all but one participant, empirical diffusion constant differences  
 138 fell within the 95% confidence interval of the simulated distribution. For some participants, the diffusion

139 constant relationship conformed to the expectations of both models (point lying near origin in Fig. 4).  
 140 These analyses thus support the idea that for most subjects, their behavior was well captured by their  
 141 better-fitting model.

142 Summaries of the predicted report-error variances by the AtD and DtA fits for well-fit participants  
 143 are shown in Fig. 5. Overall, the model predictions match participant behavior. In general, AtD  
 144 participant behavior was predicted by diffusion constants that were the same for either one Perceived  
 145 location or the mean Computed location based on 2 or 5 points (i.e., parallel lines in Fig. 5e,g). DtA  
 146 participant behavior was well predicted by diffusion constants that were larger for multiple Perceived  
 147 points compared to Single Perceived points (Fig. 5f,h). As predicted by the DtA model, the Computed  
 148 point errors for DtA participants were well predicted by  $1/N^{\text{th}}$  the diffusion constant for multiple  
 149 Perceived points (Fig. 5e-h).

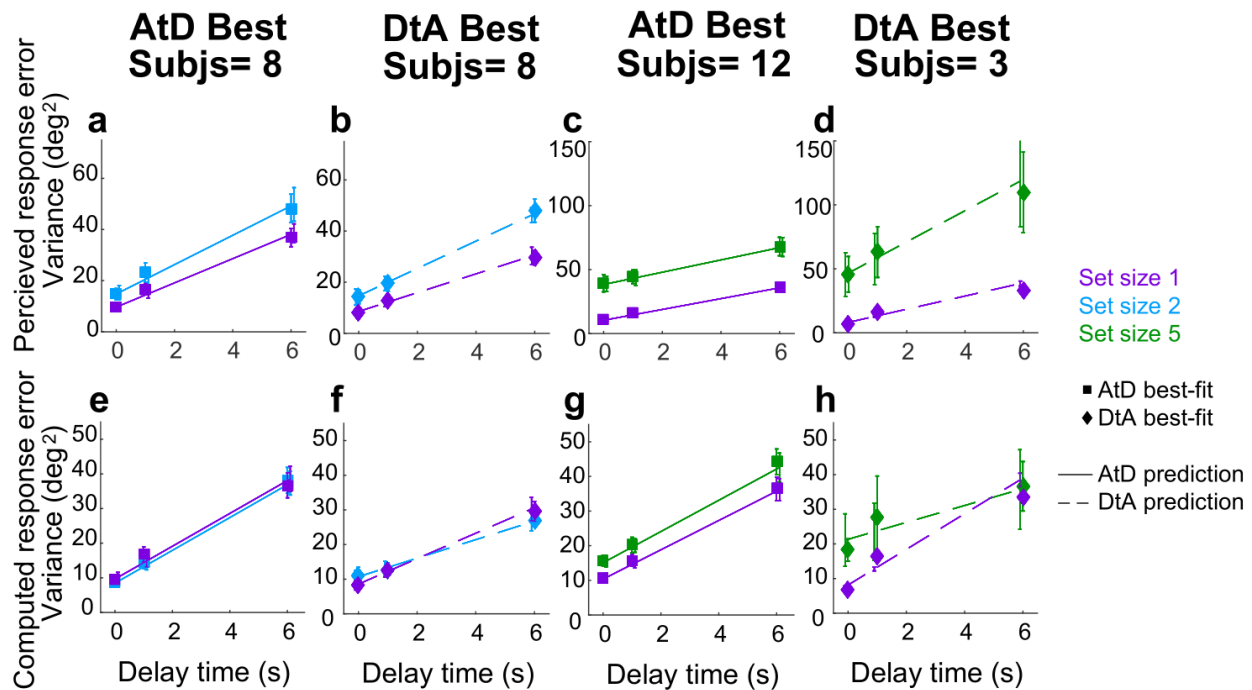

**Figure 5.** Comparison of model prediction to participant data for the Simultaneous condition. Each panel shows the empirical variance of participant errors (points and error bars are mean±SEM data across participants) and model predictions (lines, based on the mean best-fitting parameters across participants for the given model) for the participants best fit by the given model (AtD or DtA) for the given condition, as labeled above each column. A–D) Perceived blocks. E–F) Computed blocks.

## 150 Simultaneous condition strategy comparisons

151 Across the population, participants had different tendencies to use the two strategies (AtD or DtA)  
152 for the two set-size conditions (Fig. 6). Specifically, equal numbers of well-fit participants were best fit  
153 by the AtD ( $n=8$ ) and the DtA ( $n=8$ ) model for a set size of 2, and as such neither model was significantly  
154 more likely to be a better fit (Wilcoxon signed-rank two-sided test for the median difference in the log-  
155 likelihoods of fits of the two models to data from each participant= $0$ ,  $p=0.756$ ). In contrast, at set size 5,  
156 the well-fit participants were more likely to be better fit by the AtD ( $n=12$ ) than the DtA ( $n=3$ ) model  
157 ( $p=0.0027$ ). Participants who were not poorly fit at either set size were more likely to be better fit by AtD  
158 in set size 5 compared to set size 2 (Wilcoxon signed-rank two-sided test for equal median log-likelihoods  
159 difference of fits of the two models across set sizes,  $p=0.029$ ). Additionally, the log likelihood difference  
160 of strategy use did not correlate with the age of the participants (Pearson correlation, Fig. S8a,  $p>0.20$ ).  
161 These findings suggest that working-memory load may affect people's decision strategies, such that a  
162 higher load seems to correspond to an increased tendency to discard information about individual samples  
163 (disk locations) and hold only the relevant computed decision variable in memory.

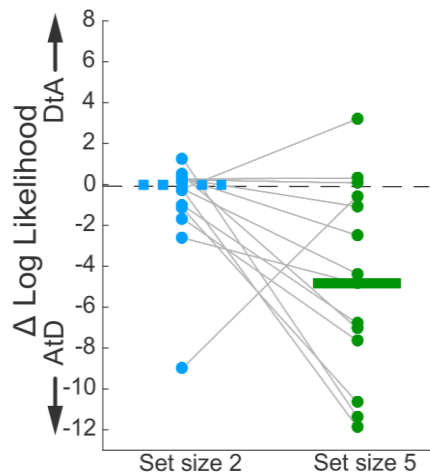

**Figure 6.** Difference in log likelihood between AtD and DtA fits for the Simultaneous condition. Negative values favor AtD. Each point represents the difference in fit log likelihoods for one participant; horizontal bars are medians (solid bar for set size 5 indicates two-sided Wilcoxon signed-rank test for  $H_0$ : median= $0$ ,  $p=0.0027$ ). Positive values favor DtA, whereas negative favor AtD. Grey lines connect data generated by the same participant. Only participants whose data were well matched to one of the two models (i.e., within the 95% confidence intervals depicted in Fig. 4) were included.

164 Sequential condition behavior

165 We separately analyzed errors for Perceived reports of disks presented at the beginning (Early)  
166 or middle (Late) of a trial. Early Perceived reports tended to be relatively unbiased (mean error not  
167 significantly different from zero; Fig. 7a, full distributions in Fig. S2) but became more variable over  
168 time in a roughly linear manner (Fig. 7d), consistent with the predictions of the particle diffusion model.  
169 For higher set sizes, errors were more variable than at lower set sizes. The rate of variance increase over  
170 time did not depend on set size (ANOVA, significant effect of set size,  $F(2,32)=33.44$ ,  $p=1.45e-08$ , and  
171 delay,  $F(1,16)=77.02$ ,  $p=1.64e-07$ , but not their interaction,  $F(2,32)=0.15$ ,  $p=0.256$ ). Late Perceived  
172 reports were likewise unbiased (mean error not significantly different from zero; Fig. 7b, full distributions  
173 in Fig. S2) and degraded in precision (i.e., increased in variance) over time (Fig. 7e). However, this  
174 degradation did not depend on set size (ANOVA, significant effect of delay,  $F(1,16)=39.28$ ,  $p=1.12e-05$ ,  
175 but not set size,  $F(1,16)=0.90$ ,  $p=0.36$  or their interaction,  $F(1,16)=0.0029$ ,  $p=0.96$ ).

176 Conversely, Computed (i.e., inferred mean) reports that required integrating both Early and Late  
177 points tended to be slightly biased towards the Early points for set size 2 (student two-sided  $t$ -test,  
178  $p<0.001$ ) but not set size 5 ( $p>0.5$ ; Fig. 6c, full distributions in Fig. S2). The Computed report errors also  
179 increased in variance over time (Fig. 7f). The overall magnitude of this imprecision and its change over  
180 time depended systematically on the number of items to remember, such that more items corresponded  
181 to a slightly greater overall variance in reports at short delays, but less gain in variance over time  
182 (ANOVA, significant effect of set size,  $F(2,32)=7.73$   $p=1.8e-3$ , delay,  $F(1,16)=73.76$ ,  $p=2.18e-07$ , and  
183 their interaction,  $F(2,32)=6.81$ ,  $p=3.4e-3$ ). This interaction of delay and set size suggests the  
184 representation of the Computed value diffused in working memory with a different diffusion constant  
185 than for a single Perceived value. This interaction is consistent with predictions of both the AtD and DtA  
186 models under these conditions, though the nature of this interaction depends on the specific model, as  
187 detailed below.

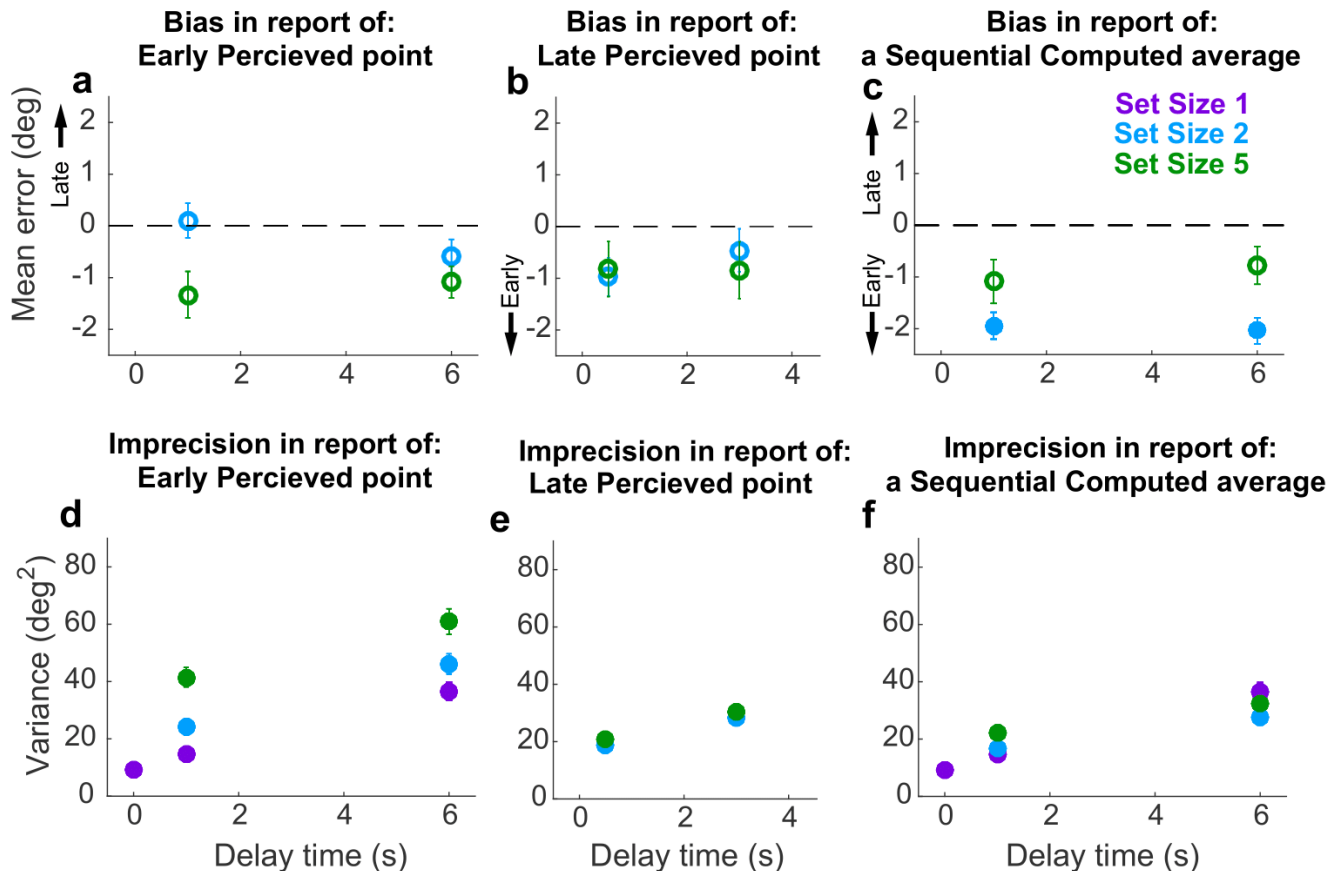

**Figure 7:** Behavioral summary for the Sequential condition. **a**) Mean error for initially presented (Early) Perceptual points for different set sizes (colors, as indicated) and delay time (abscissa). **b**) Mean error for midway presented (Late) Perceptual points for different set sizes (colors, as indicated) and delay time (abscissa). **c**) Mean Computed (inferred mean) error for different set sizes (colors, as indicated) and delay time (abscissa). Filled points in **a-c** indicate two-tailed student *t*-test for  $H_0: \text{mean}=0, p<0.05$ . **d**) Variance in Early Perceptual errors plotted as in **a**. **e**) Variance in Late Perceptual errors, plotted as in **b**. **f**) Variance in Computed (mean) errors, plotted as in **c**. In each panel, points and error bars are mean  $\pm$  SEM across participants.

## 188 Sequential condition model fitting

189 To better understand the effects of delay and set size on working-memory representations of  
 190 Perceived and Computed locations for individual participants under Sequential conditions, we fit the AtD  
 191 and DtA models separately to data from each condition and participant (Table 2; the two models each  
 192 had the same number of free parameters and thus were compared using the log-likelihoods of the fits).  
 193 Recall that the  $\eta$  parameters quantify the effect of set size on non-time-dependent noise (noise when delay  
 194 is zero), whereas  $\sigma_l^2$  is the model-based estimate of the diffusion constant for a single Perceived point.

|            | <i>Set size (N)</i> | <i>Number best-fit participants</i> | $\eta_I$   | $\eta_{NE}$ | $\eta_{NL}$ | $\eta_{MN-seq}$ | $\sigma_I^2$ | <i>A</i>   |
|------------|---------------------|-------------------------------------|------------|-------------|-------------|-----------------|--------------|------------|
| <b>AtD</b> | 2                   | 9                                   | 9.44±1.47  | 20.32±3.89  | 16.18±3.16  | 14.02±1.58      | 4.44±0.73    | -0.34±0.44 |
|            | 5                   | 9                                   | 10.69±1.21 | 37.06±5.22  | 13.19±2.06  | 15.94±1.69      | 4.22±0.73    | -0.09±0.15 |
| <b>DtA</b> | 2                   | 8                                   | 10.25±1.53 | 18.30±3.31  | 17.43±1.88  | 14.00±3.11      | 4.58±0.52    | -3.00±2.58 |
|            | 5                   | 8                                   | 9.11±1.69  | 36.59±5.54  | 22.27±4.37  | 24.45±4.60      | 4.43±0.57    | -3.89±2.90 |

**Table 2.** Summary of model fits for the Sequential condition. Parameters are: 1)  $\eta_I$ , non-time-dependent noise of a single value; 2)  $\eta_{NE}$ , non-time-dependent noise of the Early  $N-1$  points; 3)  $\eta_{NL}$ , non-time-dependent noise of the Late  $N^{th}$  points; 4)  $\eta_{MN-seq}$ , non-time-dependent noise of the mean of  $N$  points; 5)  $\sigma_I^2$ , diffusion constant of a single point; and 6) *A*, diffusion cost of additional points. For each parameter, the maximum likelihood estimates (mean over participants±SEM) is given for the participants best fit with a particular model.

195 For participants best fit by AtD at both set sizes, the average *A* was close to zero, which is  
 196 consistent with the lack of interaction between set size and delay seen in the Early and Late Perceptual  
 197 ANOVA. Unlike in the Simultaneous Condition, the participants best fit by DtA had negative *A* values  
 198 at both set sizes, implying that the diffusion constant for multiple Perceived items became closer to zero  
 199 as the number of points increased. While counterintuitive to the concept that adding more points should  
 200 increase the diffusion constant, such a negative *A* can be explained by ceiling effects: if a participant has  
 201 high levels of non-time-dependent noise, they have less room to degrade while still accurately tracking  
 202 the target (i.e., not having a lapse). Alternatively, the presentation of a new point may have had a  
 203 stabilizing effect on the ensemble by creating directional drift towards the new point rather than random  
 204 diffusion in the remaining points (Almeida et al., 2015; Wei et al., 2012), which is not inherently  
 205 accounted for in any of the present models. As in the Simultaneous condition, the models make identical  
 206 predictions when  $A=1$ . Across the population, 95% confidence intervals of *A* did not overlap with one,  
 207 supporting the distinguishability of the two models; however, this difference from one was not always  
 208 true for individual participants (Estimates of *A* on a participant-by-participant basis are shown in Fig. S5-  
 209 6).



## 210 Sequential condition model validation

211 As in the Simultaneous condition, the Sequential condition models also make predictions about  
212 the relationship between the diffusion constants of remembered Computed and Perceived values. Once  
213 again, we assessed how well participant behavior matched these assumptions, detailed in eq. 11 for AtD  
214 and eq. 12 for DtA (Fig. 8). We fit a line to the measured variances in reporting error as a function of  
215 delay for a given set size in both Perceived and Computed Sequential blocks to estimate the change in  
216 variance over time (the empirical diffusion constant estimates:  $\hat{\sigma}_I^2$ ,  $\hat{\sigma}_{NE^2}$ ,  $\hat{\sigma}_{NL^2}$ ,  $\hat{\sigma}_{MN-seq^2}$ , where  $N=2$  or  $5$  for  
217 the two set sizes). We then compared the difference of these empirical estimates to the predictions of the  
218 best-fit model for each participant (Fig. 8). We used our parametric bootstrapping variant to create  
219 simulated distributions of expected deviation from the model-defined diffusion constant relationships for  
220 each subject as described previously.

221 In general, the participant data conformed to the model predictions of the best-fit model for that  
222 participant, despite substantial individual variability. For participants whose data were best fit by the AtD  
223 model ( $n=9$  for both set sizes), empirical estimates of the diffusion constant ( $\hat{\sigma}_{MN-seq^2}$ ) from Computed  
224 blocks tended to be similar to the expected fraction of the empirical estimates of the diffusion constant  
225 for a single point (Fig. 8a,c). Specifically, for every participant the empirical diffusion constant  
226 differences fell within the 95% confidence interval computed from simulations using the model fits. For  
227 participants whose data were best fit by the DtA model ( $n=8$  for both set sizes), empirical estimates of  
228 the diffusion constant ( $\hat{\sigma}_{MN^2}$ ) from Computed blocks tended to be similar to the expected average of  
229 empirical estimates of the diffusion constant for multiple points  $(0.5\hat{\sigma}_{NL^2} + (N-1) * \hat{\sigma}_{NE^2})/N^2$ ; Fig. S10b,d).  
230 Specifically, for 7 participants, empirical diffusion constant differences fell within the 95% confidence  
231 interval computed from simulations using the model fits. The remaining subject was considered poorly  
232 fit and not considered in further analyses.

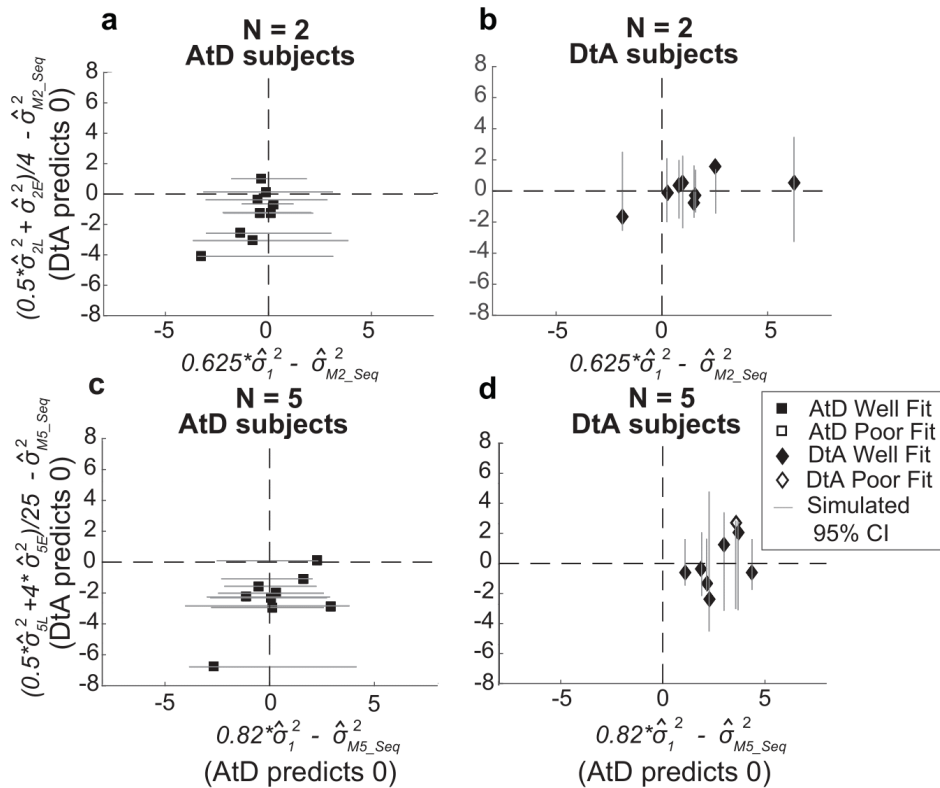

**Figure 8:** Comparisons of empirical and model-based diffusion constants. In each panel, the abscissa shows the difference between: 1) empirical estimates of the diffusion constant for a Computed value measured by fitting a line to measured variance as a function of delay time for set size 2 ( $\hat{\sigma}_{M2}^2$ , **a,b**) or 5 ( $\hat{\sigma}_{M5}^2$ , **c,d**), and 2) the empirical estimates of the diffusion constant for a single Perceived value ( $\hat{\sigma}_I^2$ ) multiplied by the appropriate factor for the set size. The Average-then-Diffuse (AtD) model predicts a difference of zero. The ordinate shows the difference between: 1) the empirical estimate of Computed diffusion constants  $\hat{\sigma}_{M2}^2$  or  $\hat{\sigma}_{M5}^2$ , and 2) the empirical estimates of the diffusion constant of a Computed value based on the DtA hypothesis. Therefore, a value of zero indicates a match between the DtA prediction of the Computed Diffusion constant and the empirically measured estimate. Points are data from individual participants, separated by whether they were best fit by the AtD (**a,c**) or DtA (**b,d**) model for the given set-size condition. Lines are 95% confidence intervals computed by simulating data using the best-fit parameters for the given fit and repeating the empirical estimate comparison procedure. Close symbols indicate participants who fell within the 95% confidence interval for their best-fit model.

233 Summaries of the predictions of report errors variances for AtD and DtA fits are shown in Fig. 9.  
 234 In general, participants best fit by AtD on average exhibited diffusion constants that were lower for  
 235 Computed than Perceived values (Fig. 9i,k; lower slope of cyan/blue line versus purple line), with the  
 236 difference decreasing with increased set size, as expected due to averaging process (Fig. 2d). Additionally  
 237 for the participants best fit by AtD, both the Early and Late variances were on average fairly well matched  
 238 by their model predictions as well (Fig. 9a,e,c,g). Conversely, participants best fit by DtA exhibited

239 diffusion constants that were notably smaller for Computed mean locations versus single Perceived  
 240 locations (Fig. 9j,l; lower slope of cyan/blue line versus purple line). The corresponding average  
 241 predictions by the best fit DtA models for error variance of Early and Late Points also aligned with  
 242 participant data from DtA fit participants (Fig. 9 b,f,d,h).

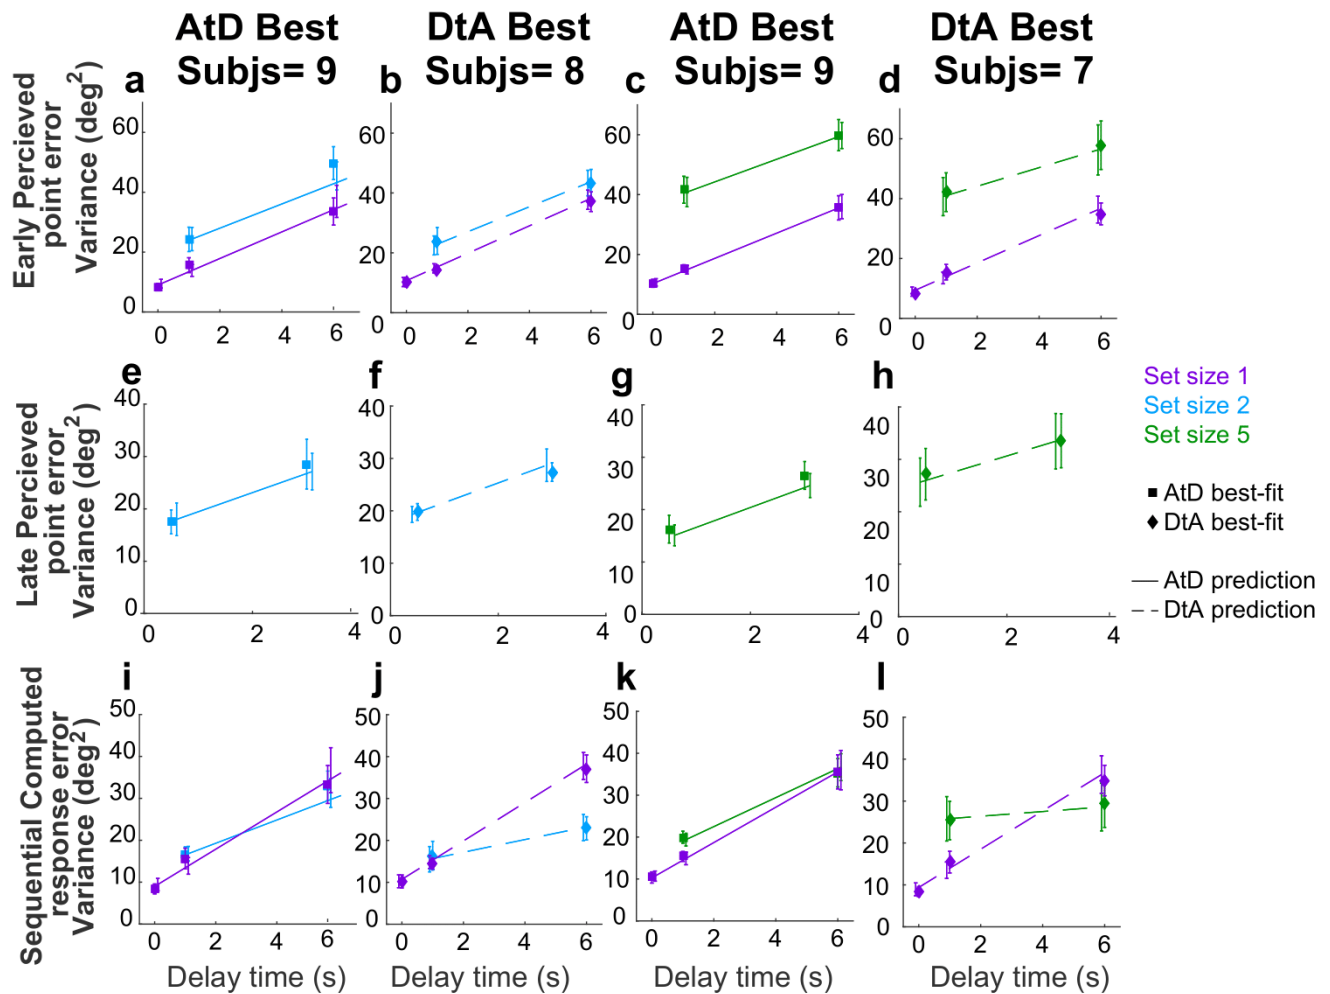

**Figure 9.** Comparison of model fits for the Sequential condition. Each panel shows the empirical variance of participant errors (points and error bars are mean $\pm$ SEM data across participants) and model predictions (lines, using mean predicted variance from each participant's best-fitting parameters for the given model) for the participants best fit by the given model (AtD or DtA) for the given condition, as labeled above each Column. Panels **a-d**) errors for Early points in Perceived Sequential, **e-h**) errors for Late points in Sequential Perceived blocks. **i-l**) depict errors for Sequential Computed blocks.

## 243 Sequential condition strategy comparisons

244 Across the population, participants had roughly equal tendencies to use either one the two  
245 strategies (AtD or DtA) for the two set-size conditions (Fig. 10). Specifically, about an equal number of  
246 participants were best fit by the AtD ( $n=9$ ) or DtA ( $n=8$ ) model for a set size of 2 (Wilcoxon signed-rank  
247 two-sided test for the median difference in the log-likelihoods of fits of the two models to data from each  
248 participant=0,  $p=0.868$ ). An approximately equal number of participants were also best fit and well fit by  
249 the AtD ( $n=9$ ) or DtA ( $n=7$ ) model for a set size of 5 and neither model was more likely to be the better  
250 fit across participants ( $p=0.234$ ). Participants not poorly fit at either set size were not significantly more  
251 likely to be fit by either model across set sizes (Wilcoxon signed-rank two-sided test for identical median  
252 log-likelihoods difference of fits of the two models across set size,  $p=0.283$ ). Additionally, the log  
253 likelihood difference of each model producing the data did not correlate with age of participants (Fig.  
254 S8b; Pearson correlation,  $p>0.20$ ). In general, all of the participants lost fidelity in their representation of  
255 a Computed value when it needed to consider sequentially presented information, as in many processes  
256 of evidence accumulation. However, the dynamics of this degradation differed for the two strategies,  
257 neither of which was more likely than the other for a given participant.

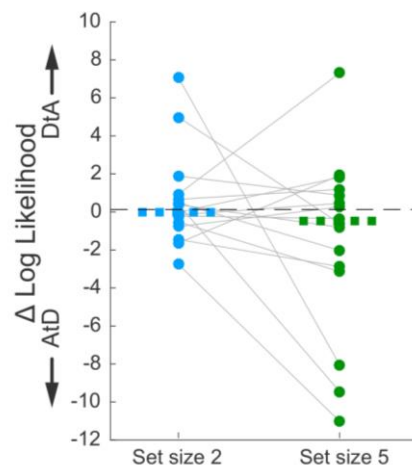

**Figure 10.** Difference in log likelihood per well-fit participant AtD and DtA fits. Negative values favor AtD. Each point represents the difference in fit log likelihoods for one participant and data from the same participant are connected across set sizes; horizontal bars are medians. Positive values favor DtA while negative values favor AtD. We failed to reject the null hypothesis (two-sided Wilcoxon signed rank test for  $H_0$ : median=0,  $p>0.05$ ) for both set sizes.

## 258 Strategy comparisons across conditions

259           The use of different strategies (i.e., those captured by the AtD and DtA models) did not appear to  
260 reflect a tendency of individual participants to use a particular strategy across different conditions.  
261 Specifically, we used Fisher's exact test of independence based on set size across temporal conditions as  
262 well as based on temporal conditions across set sizes to test whether individual participants were best fit  
263 by the same model under different task conditions. We failed to reject the null hypothesis that there is no  
264 relationship between a participant's strategy use across set size for both Simultaneous and Sequential  
265 conditions (i.e., strategy use in set size 2 Simultaneous was not predictive of use in set size 5  
266 Simultaneous, nor was it for Sequential conditions;  $p=0.31$  and  $p=1$  respectively). We also failed to reject  
267 the null hypothesis that there is no relationship between a participant's strategy use across temporal  
268 conditions for both set sizes 2 and 5 ( $p=0.54$  and  $p=1$  respectively). Thus, we found that only under set  
269 size 5 were Simultaneous conditions participants more likely to use one strategy (AtD) over the other  
270 (DtA). In all other tested cases, participants were equally likely to use either strategy, and strategy use  
271 was not predictive across conditions for individual participants.

## 272 **Discussion**

273           The goal of this study was to better understand if and how capacity and temporal limitations of  
274 working memory affect human decision-making. We used a task that required participants to report  
275 remembered spatial locations based on different numbers of objects and for different delay durations,  
276 both of which are known to systematically affect the precision of memory reports (Bastos et al., 2018;  
277 Cowan et al., 2008; Funahashi et al., 1989; Oberauer et al., 2016; Panichello et al., 2019; Ploner et al.,  
278 1998; Schneegans & Bays, 2018; White et al., 1994). We used two pairs of conditions to investigate these  
279 effects across decision-making circumstances. The first condition was Perceptual versus Computed,  
280 which allowed us to recapitulate previous findings of the effects of capacity and temporal limitations of  
281 working memory for directly observed (perceptual) quantities and then extend those findings to the kind

282 of computed quantity that is used as a decision variable for tasks that require integration or averaging to  
283 reduce uncertainty (Brody & Hanks, 2016; Gold & Shadlen, 2007; Ratcliff et al., 2016; Shadlen &  
284 Shohamy, 2016; Summerfield & Tsetsos, 2012). The second was Simultaneous versus Sequential  
285 conditions, which extended our investigation to include the effects of working-memory limitations on  
286 decision making under relatively simple conditions (i.e., when all relevant evidence was presented at  
287 once) to the effects in a basic case of evidence accumulation over time (i.e., in which a new piece of  
288 evidence is used to update a computed quantity).

289         Our primary finding was that computed variables based on either simultaneously or sequentially  
290 presented information were susceptible to the same kinds of working-memory constraints as perceived  
291 variables. These working-memory limitations corresponded to a decrease in precision over time, which  
292 places critical constraints on the kinds of decision variables that are required to persist over time, such as  
293 when decisions are delayed. This result appears to contradict previous findings that found no effect of  
294 extra delays on the effectiveness of evidence accumulation for certain decisions (Liu et al., 2015;  
295 Waskom & Kiani, 2018). However, those studies used tasks with binary choices that required decision  
296 variables with less clear sensitivity to the kinds of working-memory effects we found in the context of a  
297 continuous, spatially based decision variable. Additionally, we found that increasing the number of  
298 decision-relevant points also decreased the accuracy of the continuous decision variable, although the  
299 nature of this effect was variable. More work is needed to fully characterize the conditions under which  
300 temporal and capacity limitations on the precision of working-memory representations affect decisions  
301 based on those representations.

302         We also found that the exact nature of interactions between working-memory limitations and  
303 decision-making depend critically on the strategy used to form the decision, and those strategies can vary  
304 substantially across individuals and tasks. For our task, we focused on two primary strategies. The first  
305 strategy, captured by the Average-then-Diffuse (AtD) model, stipulated that a participant first calculates

306 and then stores the Computed value. Its key prediction is that a Computed value should be susceptible to  
307 the same effects of working-memory limitations as a single remembered Perceptual value in simultaneous  
308 conditions. The second strategy, captured by the Diffuse-then-Average (DtA) model, stipulated that all  
309 individual values are stored in working memory until the time of decision. Its key prediction is that the  
310 overall rate of variance increase is inversely related to the number of items. We found that participants  
311 tended to use an AtD strategy for the Simultaneous conditions with a relatively high load (five items),  
312 but otherwise were roughly equally likely to use either strategy, including for all Sequential conditions.

313         This finding of multiple strategy use raises several intriguing future questions. For example, we  
314 found that for the Simultaneous condition, several individuals switched from using DtA for the smaller  
315 set size to AtD for the larger set size, but we do not know if this switch was a consequence of their  
316 personal working-memory capacities. From an optimality standpoint, DtA better preserves a computed  
317 value compared to AtD for a given level of non-time-dependent noise and cost per storage item ( $A$ ), but  
318 only if  $A$  remains low ( $<1$ ). It would be interesting to see if for more intermediate set sizes (i.e., 3 or 4  
319 items) there is a reliable increase in the probability of a participant using AtD with a progression that  
320 relates to other measures of the individual's working-memory capacity. Such future studies would more  
321 definitively support the conclusion that increased working-memory load corresponds to an increased  
322 tendency to discard information about individual samples and hold only the computed decision variable  
323 in memory. Future studies should also examine other factors that might govern which strategy is used for  
324 a given set of conditions. For example, participants in our study were instructed to report the average but  
325 given no additional details about how to do so, nor given strong incentives for choosing any particular  
326 strategy versus another. Future studies could provide more detailed instructions, incentives, and/or  
327 feedback to better understand the flexibility with which these different strategies can be employed.

328         Future work should also examine in more detail several other facets of working memory that were  
329 not included in our models but in principle could affect decision variables that are computed and retained

330 over time. First, our DtA model assumed no interference between multiple items stored in memory. This  
331 assumption is undoubtedly an oversimplification, given that storage of multiple points has been both  
332 hypothesized and shown to create attraction and repulsion (Almeida et al., 2015; Kilpatrick, 2018; Wei  
333 et al., 2012). Such directional drift can create a decrease in variance over time that could affect decision  
334 variables that involve multiple quantities stored at once. Second, our DtA model also assumed that each  
335 item was stored individually. Alternatively, items could have been discarded or merged (chunked)  
336 (Kilpatrick, 2018; Wei et al., 2012), leading to different memory loads which could also affect  
337 performance. Third, we did not find strong evidence that participant behavior could not be described by  
338 the AtD or DtA model, but there was some evidence that our poorly fit subjects might have been using a  
339 strategy that started out storing multiple points as in DtA but that combined the evidence into a single  
340 variable midway through the delay in an AtD-like fashion. This kind of strategy would suggest extensive  
341 flexibility in when and how evidence is incorporated into computed decision variables, thereby placing  
342 potentially complex demands on working memory.

343         Both of our models were based on assumptions of a drifting memory representation. This random  
344 drift is traditionally associated with attractor models of working memory (Bays, 2014; Compte, 2000;  
345 Macoveanu et al., 2007; Wei et al., 2012) that have been used extensively to describe the underlying  
346 neural mechanisms (Funahashi et al., 1989; Shafi et al., 2007; Takeda & Funahashi, 2002; Wimmer et  
347 al., 2014). In these models, neural network activity is induced by an external stimulus and then maintained  
348 via excitatory connections of similarly tuned neurons and long-ranged inhibition. Random noise causes  
349 the center of this activity (which represents the stimulus) to drift in a manner that, dependent on the  
350 implementation, can depend on the delay duration, set size, and/or their interaction (Almeida et al., 2015;  
351 Bays, 2014; Koyluoglu et al., 2017). A recent implementation even can naturally compute a running  
352 average based on sequentially presented information (Esnaola-Acebes et al., 2021). Our results imply  
353 that such models should be extended to support the flexible use of different strategies that govern when



354 and how incoming information is used to form such averages. It will be interesting to see if such a flexible  
355 model can account for neural activity in the dorsolateral prefrontal cortex (dlPFC), which includes  
356 neurons with persistent activity that has been associated with both spatial working memory<sup>11,22–25</sup> and the  
357 formation of decisions based on an accumulation of evidence (Curtis & D’Esposito, 2003; H. R. Heekeren  
358 et al., 2006; Hauke R. Heekeren et al., 2008; Kim & Shadlen, 1999; Lin et al., 2020; Philiastides et al.,  
359 2011).

360           In conclusion, we found that in this spatial, continuous task, participant accuracy for both perceived  
361 and computed values was subject to working-memory limitations of both time and capacity. Additionally, we  
362 found behavior that was consistent with both the storage strategies we investigated. The fact that different  
363 participants employed different strategies for storing a computed value (such as a decision variable) and that  
364 these strategies have different consequences on overall accuracy has important implications for not only future  
365 neural network models of working memory, but also for future computational models of decision-making.

## 366 **Materials and Methods**

### 367 Human psychophysics behavioral task.

368 We tested 17 participants (4 male, 12 female, 1 chose not to answer; age range=22–87 yrs). The  
369 task was created with PsychoPy3(Peirce et al., 2019) and distributed to participants via Pavlovia.com,  
370 which allowed participants to perform the task on their home computers after providing informed consent.  
371 These protocols were reviewed by the University of Pennsylvania Institutional Review Board (IRB) and  
372 determined to meet eligibility criteria for IRB review exemption authorized by 45 CFR 46.104, category  
373 2.

374 Participants were instructed to sit one arm-length away from their computer screens during the  
375 experiment and to use the mouse to indicate choices. Each participant completed 1–2 sets of 4 blocks of  
376 trials in their own time.

377 The basic trial structure is illustrated in Fig. 1. Each trial began with the presentation of a central  
378 white fixation cross (1% of the screen height). The participant was instructed to maintain fixation on this  
379 cross when not actively responding. The participant began each trial by placing the mouse over the cross  
380 and clicking, to allow for self-pacing and pseudo-fixation. Initiating a trial caused a white annulus of  
381 radius 25% of the screen height to appear. A block-specific memory array appeared 250 ms later, centered  
382 at an angle chosen uniformly and at random on the annulus. The array consisted of 1, 2, or 5 colored disks  
383 sized 1.5% screen in diameter. The angular difference between any two adjacent disks was at least  $6^\circ$ ,  
384 and between the two most distal disks was at most  $60^\circ$ . The disks from clockwise to counter-clockwise  
385 were always presented in the same order: green, red, blue, magenta, and yellow. When fewer than five  
386 disks were presented, the latter colors were omitted. The consistent color ordering was intended to reduce  
387 errors caused by mis-binding of location and color. The angular differences between disks in an array  
388 was randomly selected from 5 preselected sets. The memory array remained on the screen for 0.5 s, while  
389 the annulus remained on the screen throughout the delay of 0, 1, or 6 s. At the end of the delay, the

390 fixation cross was replaced with a response cue that either matched a color of a disk in the memory array,  
391 indicating a response to the remembered location of that disk, or was white, indicating a response to the  
392 mean angle of all disks in the present trial. The response type varied by block (see below). The participant  
393 then moved the mouse and clicked on the annulus at a position at which they remembered the requested  
394 response. Feedback was then given indicating the correct location, the participant's response, and the  
395 difference between the two.

396         We used four block-wise conditions: 1) Simultaneous Perceived blocks used arrays of 1, 2, or 5  
397 disks presented simultaneously at the beginning of the trial. Participants were told in advance that they  
398 would always be asked to report the location of one of the array disks but were not informed which one  
399 until the response period. The probed disk was picked randomly on each trial. 2) Simultaneous Computed  
400 blocks used arrays of 2 or 5 disks presented simultaneously at the beginning of the trial. Participants were  
401 told in advance they would need to report the average angle of all disks shown in the present trial. 3)  
402 Sequential Perceived blocks were identical to Simultaneous Perceived blocks, except only arrays of 2 or  
403 5 disks were used, and all but one of the disks (the counter-clockwise most) was presented at the beginning  
404 of the trial. The final disk was presented for 0.5 s ending midway through the delay of 1 or 6 s. Participants  
405 were told in advance that the final disk would be presented in the middle of the delay for these blocks. 4)  
406 Sequential Computed blocks were identical to Simultaneous Computed blocks, but with delayed  
407 presentation of the final disk as in Sequential Perceived blocks. Again, participants were told in advance  
408 that the final disk would be presented in the middle of the delay.

409         All participants completed one and most (12) participants completed two blocks of each type. Each  
410 block contained 50 trials at each set size and each delay time, the order of which was randomized.

411 Basic analyses.

412         Trials were excluded from analysis if the response was  $>30^\circ$  from the correct angle. This cutoff  
413 was based on assessment of the error distributions (Fig. S1-2); using a cutoff of  $25^\circ$  did not noticeably  
414 change the results. On average,  $<10\%$  of trials were excluded per delay condition per set size per block  
415 (see Fig. S1-2). These trials were excluded to focus analysis on trials that were directed towards the  
416 correct location and avoid lapses of attention and extreme motor errors. We investigated both the bias  
417 and variance in participant responses, as follows.

418         We quantified bias as the mean error between the response and the true probed angle for each  
419 participant and condition (positive/negative values imply errors that were systematically  
420 counterclockwise/clockwise respectively). A Bonferroni-corrected two-sided *t*-test was used to assess  
421 whether this mean response error was significantly different from zero across participants for each set  
422 size, delay, response type and temporal presentation. Additionally, the mean error and confidence interval  
423 for each subject were calculated for each condition (Fig. S3-6).

424         We quantified the variance of the error between the response and the true probed angle for each  
425 participant and condition. We chose variance as opposed to other measures of dispersion for consistency  
426 with our particle models (see below) in which variance scales linearly with delay. We examined effects  
427 of set size, delay duration, and task context on response variability using a two-way repeated measures  
428 ANOVA. On Simultaneous Perceived and Computed blocks, we used a 3 (delay duration: 0, 1, or 6 s) x  
429 3 (set size: 1, 2, or 5 disks) within-participant design. On Sequential Perceived blocks, we used a 2 (delay  
430 duration: 1 or 6 s) x 3 (set size: 1, 2, or 5 disks) within-participants design for stimuli presented at the  
431 beginning of the trial (Early) and a 2 (delay: 0.5 or 3 s) x 2 (set size: 2 or 5 disks) design for stimuli  
432 presented halfway through the trial (Late). On Sequential Computed blocks, we used a 2 (delay duration:  
433 1 or 6 s) x 3 (set size: 1, 2, or 5 disks) within-participants design. When the comparison included set  
434 size=1, data were always taken from the Simultaneous Perceived block.

435 Model-based analyses.

436 Our models were based on principles of working memory that are well described by bump-  
437 attractor network models (Compte, 2000; Laing & Chow, 2001; Wimmer et al., 2014). In such models,  
438 stimulus location is represented by a “bump” in activity from neurons tuned to that and similar locations.  
439 These neurons recurrently activate each other, maintaining a bump of activity even after stimulus  
440 cessation. However, because of the stochastic nature of neural activity and synaptic transmission (Faisal  
441 et al., 2008), there is variability in which neurons have the most activity at any given time (and thus are  
442 the center of the bump representing the stimulus). This variability in bump center corresponds to  
443 variability in the location representation and a degradation of the memory representation over time. The  
444 dynamics of this bump can be described as a diffusion process that obeys Brownian motion (Compte,  
445 2000; Kilpatrick, 2018; Kilpatrick et al., 2013; Laing & Chow, 2001). We used this simplified description  
446 in our models as follows.

447 Perceived values in working memory.

448 A single point (i.e., the central spatial location of a single disk),  $x_l$ , is assumed to be represented  
449 in working memory by  $\hat{x}_{t,l}$ , where  $t$  represents the time since the removal of the stimulus. We assume that  
450  $\hat{x}_{t,l}$  evolves like a sample from a Brownian-motion process. Specifically, when  $x_l$  is observed, it is  
451 encoded with some perceptual noise,  $\eta^p$ . Therefore, at time zero,  $\hat{x}_{0,l} \sim N(x_l, \eta^p)$ . This representation  
452 accumulates noise over time with some diffusion constant,  $\sigma_l^2$ , further degrading the representation of  
453  $\hat{x}_{t,l}$  from  $x_l$  such that  $\hat{x}_{t,l} \sim N(x_l, \eta^p + t \cdot \sigma_l^2)$ . There is additional motor noise in the participant’s report,  $r_{t,l}$ ,  
454 and we denote the variance of this motor noise by  $\eta^m$ . Mathematically, it is equivalent to add the motor  
455 noise at the beginning or the end of the diffusion of  $\hat{x}_{t,l}$  when considering the report,  $r_{t,l}$ . In our model,  
456 we thus represent the sum of the perceptual and motor noise as a single, *non-time-dependent* noise term.  
457 Hence, we show simulated trajectories of  $\hat{x}_{t,l}$  in Fig. 2a with an initial variance of  $\eta_l = \eta^p + \eta^m$  so that at  
458 time  $t$  the report,  $r_{t,l}$  is the current angle of the trajectory. Therefore:

459 
$$r_{t,l} \sim N(x_l, \eta_l + t * \sigma_l^2). \quad (1)$$

460 When multiple items are held in memory, they are held with less fidelity than a single point (Bays  
461 et al., 2009; Brady & Alvarez, 2015; Koyluoglu et al., 2017; Wei et al., 2012). We therefore assume that  
462 the sum of the initial perceptual noise and final motor noise, with variance denoted by  $\eta_N$ , can depend on  
463 the number of disks,  $N$ . Moreover we describe,  $\hat{x}_{t,n}$ , the representation of the  $n^{\text{th}}$  item at time  $t$ , by a  
464 normal distribution with a diffusion constant that is potentially higher than for a single point. We assume  
465 that this new diffusion constant  $\sigma_N^2$ , equals  $\sigma_l^2 * N^A$  and thus scales as a power of the total number of  
466 stimuli,  $N$ , held in memory (Bays et al., 2009; Bays & Husain, 2008; Wei et al., 2012), and is proportional  
467 to the diffusion constant corresponding to a single stimulus representation,  $\sigma_l^2$ . Therefore:

468 
$$r_{t,n} \sim N(x_n, \eta_N + t * \sigma_l^2 * N^A) \quad (2)$$

469 All representations in a set of size  $N$  share the same magnitude of non-time-dependent noise,  $\eta_N$ ,  
470 but the evolution of each representation is assumed to be independent. To examine distributions of  
471 responses across the various presented locations, we measured the error of the response  $r_{t,n}$  relative to the  
472 true location of the target the observer was asked to report,  $x_{t,n}$ . According to our model, the difference  
473 between the true and reported location (the error,  $e_{t,n}$ ) is

474 
$$e_{t,l} \sim N(0, \eta_l + t * \sigma_l^2) \quad (3a)$$

475 
$$e_{t,n} \sim N(0, \eta_N + t * \sigma_l^2 * N^A) \quad (3b)$$

476 The linear relationship between total accumulated noise and time for both a single and multiple  
477 memoranda is illustrated in Fig. 2b.

478 Average-then-Diffuse (AtD) Simultaneous model.

479 For this model, the representation of the average is stored as a single particle and diffuses the  
480 same as a Perceived point (i.e., a location at which there was a visible stimulus) (See Fig. 2b). Thus, the  
481 diffusion term for the representation of a computed average of  $N$  points,  $\sigma_{MN}^2$ , is also  $\sigma_l^2$ . We do not

482 assume that the representation of the average has the same non-time-dependent noise as a single point,  
483 because there could be additional noise from inaccurately averaging multiple points or conversely a  
484 reduction in overall noise resulting from the averaging of multiple random variables (constituent points).  
485 We denote the variance of the non-time-dependent noise for the Computed mean by  $\eta_{MN}$ . The difference  
486 between the true mean of  $N$  stimuli and the mean reported at time  $t$  is therefore,

$$487 \quad e_{t,mNA_tD} \sim N(0, \eta_{MNA_tD} + t^* \sigma_I^2) \quad (4)$$

#### 488 Diffuse-then-Average (DtA) Simultaneous model.

489 For this model, the individual perceived points are stored as individual, independently diffusing  
490 particles and then averaged at the end of the trial. Thus, the diffusion constant of the Computed value is  
491 the variance of the average of  $N$  random variables each with the diffusion constant  $\sigma_I^2 * N^A$ , resulting in  
492 an effective diffusion constant for the Computed value of  $\sigma_{MN}^2 = \sigma_I^2 * N^A / N$ , where the division by  $N$  arises  
493 from averaging. Again, we allow for a free non-time-dependent-noise term because of the uncertain  
494 effects of the averaging calculation itself. For this model, the error in the reported location at time  $t$  of  
495 the average of the mean,  $M$ , of  $N$  points,  $e_{t,MN}$ , is:

$$496 \quad e_{t,mNDtA} \sim N(0, \eta_{MNDtA} + t^* \sigma_I^2 * N^A / N) \quad (5)$$

497 If  $A=1$ , the AtD and DtA models are identical. We thus used best-fitting values of  $A$  to help assess  
498 model distinguishability for each participant and task condition (see Fig. S7). Also, if  $A < 1$ , then the DtA  
499 strategy results in a lower diffusion constant for a Computed value than predicted by the AtD model and  
500 results in a smaller average reporting error (see Fig. 2c). If  $A > 1$ , then AtD results in the lower diffusion  
501 constant and thus a lower average reporting error. However, we did not find that participants necessarily  
502 used the objectively optimal (i.e., lowest-error) strategy in making their decisions.

503 Sequentially presented values in working memory.

504 In the Sequential blocks,  $N-1$  points were presented immediately (Early points), and the  $N^{\text{th}}$  point  
505 was presented halfway through the delay (Late point). Therefore, both our modeling assumes that the  
506 diffusion constant for the representation of the  $N-1$  early stimuli change with the addition of the  $N^{\text{th}}$  point.  
507 In contrast, the representation of the Late stimulus diffuses only for half of the delay time,  $T$ , as shown  
508 in Fig. 2c. We formalize this process by the following model for the report error of the Early ( $e_{T,NE}$ ), and  
509 Late ( $e_{T,NL}$ ) stimuli:

$$510 \quad e_{T,NE} \sim N(0, \eta_{NE} + T/2 * \sigma_I^2 * (N-1)^A + T/2 * \sigma_I^2 * N^A) \quad (6a)$$

$$511 \quad e_{T,NL} \sim N(0, \eta_{NL} + T/2 * \sigma_I^2 * N^A) \quad (6b)$$

512 Here  $T$  is the total time of the delay, and we assumed different non-time-dependent noise for both  
513 Early and Late points,  $\eta_{NE}$  and  $\eta_{NL}$ , respectively.

514 AtD Sequential model:

515 This model assumes that the Early points are averaged immediately and stored as a single point.  
516 At  $t=T/2$ , the Late point is presented and the stimulus is immediately combined, through appropriate  
517 weighted averaging, with the mean of the Early points. This new mean again diffuses with the same  
518 accumulating noise as a single point, as depicted in Fig. 2d. Therefore:

$$519 \quad e_{T,MN-seqAtD} \sim N(0, \eta_{MN-SeqAtD} + ((N-1)/N)^2 * T/2 * \sigma_I^2 + T/2 * \sigma_I^2) \quad (7)$$

520 At  $t=T/2$ , the representation of the  $N^{\text{th}}$  stimulus has not accumulated any diffusion noise and only  
521 has non-time-dependent noise, which is absorbed in the  $\eta_{MN-Seq}$  term. The first time-dependent term,  $((N-$   
522  $1)/N)^2 * T/2 * \sigma_I^2$ , results from the appropriate weighted averaging of the mean of the Early points (time-  
523 dependent noise of  $T/2 * \sigma_I^2$ ) with the Late point (time-dependent noise=0). The final term,  $T/2 * \sigma_I^2$ , is  
524 the diffusion of the resultant mean until the end of the delay.



525 DtA Sequential model:

526 This model assumes that the representations of all  $N$  points diffuse as they are presented, resulting  
527 in  $N-1$  points described by eq. 6a and one point described by eq. 6b. These points are then averaged at  
528 the end of the delay, resulting in an overall error of:

529 
$$e_{T,MN-seqDtA} \sim N(0, \eta_{MN-SeqDtA} + (T/2 * \sigma_I^2 * N^A + \dots$$
  
530 
$$(N-1) [T/2 * \sigma_I^2 * (N-1)^A + T/2 * \sigma_I^2 * N^A] ) / N^2) \quad (8)$$

531 where the constant noise terms from the Early and Late points are absorbed in the  $\eta_{MN-SeqDtA}$  term, the  
532 next term  $T/2 * \sigma_I^2 * N$  is the diffusion in the representation of the last disk shown, and the remaining terms  
533 arise from the first  $N-1$  disks shown. The effect of this averaging on the effective diffusion constant are  
534 shown in Fig. 2d.

535 Model fitting.

536 To fit both the AtD and DtA models to data from the Perceived and Computed blocks we had to  
537 estimate 5 parameters: 1) the non-time-dependent noise of a single point ( $\eta_I$ ), 2) the diffusion noise of a  
538 single point ( $\sigma_I^2$ ), 3) the non-time-dependent noise of  $N$  points ( $\eta_N$ ), 4) the exponent of storing  $N$  points  
539 ( $A$ ), and 5) the non-time-dependent noise of the mean ( $\eta_{MN(AtD \text{ or } DtA)}$ ). We fit these models for  $N=2$  and  
540  $N=5$  separately using trials from the following conditions: Perceived Simultaneous delays of 1, 3, and 6  
541 s, with array sizes 1 (eq. 3a) and  $N$  (eq. 3b); Computed Simultaneous, delays of 1, 3, and 6 s, with array  
542 size  $N$  (eq. 4 for AtD, eq. 5 for DtA).

543 Data from the Sequential Perceived and Sequential Computed blocks were fit to the AtD and DtA  
544 models with 6 parameters. The additional parameter accounted for differences in the non-time-dependent  
545 noise for Early and Late points. We fit these models for  $N=2$  and  $N=5$  separately using trials from the  
546 following conditions: Perceived, delay 1, 3, and 6 s with array sizes 1 (eq. 3a); Sequential Perceived,

547 delay of 3 and 6 s, array size  $N$  for both Early (eq. 6a) and Late (eq. 6b) points; Sequential Computed,  
548 delay of 3 and 6 s, array size  $N$  (eq. 7 for AtD or eq. 8 for DtA).

549         Because the mean error for each individual participant was not always zero, when fitting the AtD  
550 and DtA models we used the empirical mean error from the condition being fitted as a fixed bias term in  
551 the model. Mean error and confidence intervals for each participant for each condition are shown in Fig.  
552 S3-6.

553         We obtained separate maximum-likelihood fits for AtD and DtA models for each individual  
554 participant, using the function `fmincon` in MATLAB to minimize the summed negative log likelihood of  
555 obtaining the observed errors for a given condition according to the above equations. Initial parameter  
556 values were randomized and the fitting repeated to avoid local minima. Because all models within a given  
557 condition had the same number of parameters, we compared log likelihoods to determine the best-fitting  
558 model for a given participant. Because the number of parameters are the same, comparing likelihoods  
559 produces equivalent model selection to BIC or AIC.

#### 560 Goodness-of-fit.

561         To assess how well each participant's data matched the assumptions of the AtD and DtA models,  
562 we also fit a line to the variances of response errors across delays for a given condition for a given  
563 participant to obtain empirical estimates of the various diffusion constants (e.g., slope of lines in Fig. 2b;  
564 empirical estimate of a Perceived value,  $\hat{\sigma}_N^2$ , for set size  $N$ ; empirical estimate of a Computed value,  
565  $\hat{\sigma}_{MN}^2$ , set size  $N$ ). These empirical estimates of the diffusion constants did not enforce the relationships  
566 imposed by the AtD and DtA models between the different diffusion constants in each model  
567 respectively. We compared the relationships of these empirical estimates of diffusion constants to the  
568 relationships assumed by our models.

569 AtD Simultaneous expected diffusion constant relationship:

570 Under the AtD hypothesis, for Simultaneous conditions, the Computed mean diffuses with the  
571 same diffusion constant as a single value. Thus:

$$572 \quad \sigma_I^2 - \sigma_{MN}^2 = 0 \quad (9)$$

573 DtA Simultaneous expected diffusion constant relationship:

574 Under the DtA hypothesis, for Simultaneous conditions, the Computed mean is the average of  $N$   
575 points each diffusing with a constant of  $\sigma_N^2$ . Thus:

$$576 \quad \sigma_N^2/N - \sigma_{MN}^2 = 0 \quad (10)$$

577 AtD Sequential expected diffusion constant relationship:

578 Under the AtD hypothesis, for Sequential conditions, the time-dependent noise has variance that  
579 increases as  $((N-1)/N)^2 * T/2 * \sigma_I^2 + T/2 * \sigma_I^2$  (eq. 7). Factoring out T gives the diffusion constant for the  
580 Computed mean,  $\sigma_{MN}^2 = [(N-1)^2 + N^2]/(2N^2) * \sigma_I^2$ . Thus:

$$581 \quad [(N-1)^2 + N^2]/(2N^2) * \sigma_I^2 - \sigma_{MN}^2 = 0 \quad (11)$$

582 DtA Sequential expected diffusion constant relationship:

583 Under the DtA hypothesis, for Sequential conditions, the time-dependent noise has variance that  
584 increases as  $T/2 * \sigma_I^2 * N^A + (N-1) [ T/2 * \sigma_I^2 * (N-1)^A + T/2 * \sigma_I^2 * N^A ] / N^2$  (eq. 8). By eq. 6a, the diffusion  
585 constant for an Early Perceived point,  $\sigma_{NE}^2$ , is  $[0.5 * \sigma_I^2 * (N-1)^A + 0.5 * \sigma_I^2 * N^A]$  and by eq. 6b, the diffusion  
586 constant for a Late Perceived point,  $\sigma_{NL}^2$ , is  $\sigma_I^2 * N^A$ . Factoring out T and substituting gives the diffusion  
587 constant for the Computed mean,  $\sigma_{MN}^2 = (0.5\sigma_{NL}^2 + (N-1) * \sigma_{NE}^2) / N^2$ . Thus:

$$588 \quad (0.5 * \sigma_{NL}^2 + (N-1) * \sigma_{NE}^2) / N^2 - \sigma_{MN}^2 = 0 \quad (12)$$

589 To assess how well the relationships between participant empirical estimates of the diffusion  
590 constants matched these assumptions, for each participant we simulated 1000 iterations of a participant

591 performing the task using the best-fit model for the given true participant and the maximum likelihood  
592 estimate parameters for that participant. We then estimated the empirical diffusion constants for each of  
593 these iterations as we did for our participants, namely fitting a line to the measured variance of the  
594 simulated errors across delays, for each condition and iteration. Our 1000 simulations gave us an expected  
595 range around the expected diffusion constant relationships detailed in eq. 9–12 to compare to our  
596 participants' empirical diffusion constant relationships. Participants whose empirical diffusion constant  
597 relationships fell within the central 95% of the simulated expected range were considered well fit by their  
598 model.

## Acknowledgements

599 We thank Adrian Radillo and Gaia Tavoni for their discussions early in the development of this project,  
600 particularly regarding early formulations of the models used here and task structure.

## 601 Competing Interests

602 The authors declare no competing interests

## References

- Almeida, R., Barbosa, J., & Compte, A. (2015). Neural circuit basis of visuo-spatial working memory precision: a computational and behavioral study. *Journal of Neurophysiology*, *114*(3), 1806–1818. <https://doi.org/10.1152/jn.00362.2015>
- Bastos, A. M., Loonis, R., Kornblith, S., Lundqvist, M., & Miller, E. K. (2018). Laminar recordings in frontal cortex suggest distinct layers for maintenance and control of working memory. *Proceedings of the National Academy of Sciences of the United States of America*, *115*(5), 1117–1122. <https://doi.org/10.1073/pnas.1710323115>
- Bays, P. M. (2014). Noise in neural populations accounts for errors in working memory. *The Journal of Neuroscience : The Official Journal of the Society for Neuroscience*, *34*(10), 3632–3645. <https://doi.org/10.1523/JNEUROSCI.3204-13.2014>
- Bays, P. M., Catalao, R. F. G., & Husain, M. (2009). The precision of visual working memory is set by allocation of a shared resource. *Journal of Vision*, *9*(10), 7.1-11. <https://doi.org/10.1167/9.10.7>
- Bays, P. M., & Husain, M. (2008). Dynamic shifts of limited working memory resources in human vision. *Science*, *321*(5890), 851–854. <https://doi.org/10.1126/science.1158023>
- Bernacchia, A., Seo, H., Lee, D., & Wang, X. J. (2011). A reservoir of time constants for memory traces in cortical neurons. *Nature Neuroscience*, *14*(3), 366–372. <https://doi.org/10.1038/nn.2752>
- Brady, T. F., & Alvarez, G. A. (2015). Contextual effects in visual working memory reveal hierarchically structured memory representations. *Journal of Vision*, *15*(15), 6. <https://doi.org/10.1167/15.15.6>
- Brody, C. D., & Hanks, T. D. (2016). Neural underpinnings of the evidence accumulator. In *Current Opinion in Neurobiology* (Vol. 37, pp. 149–157). Elsevier Ltd. <https://doi.org/10.1016/j.conb.2016.01.003>
- Compte, A. (2000). Synaptic Mechanisms and Network Dynamics Underlying Spatial Working Memory in a Cortical Network Model. *Cerebral Cortex*, *10*(9), 910–923. <https://doi.org/10.1093/cercor/10.9.910>
- Constantinidis, C., Funahashi, S., Lee, D., Murray, J. D., Qi, X.-L., Wang, M., & Arnsten, A. F. T.

- (2018). Persistent Spiking Activity Underlies Working Memory. *The Journal of Neuroscience : The Official Journal of the Society for Neuroscience*, 38(32), 7020–7028. <https://doi.org/10.1523/JNEUROSCI.2486-17.2018>
- Cowan, N., Morey, C. C., Chen, Z., Gilchrist, A. L., & Saults, J. S. (2008). Theory and Measurement of Working Memory Capacity Limits. In *Psychology of Learning and Motivation - Advances in Research and Theory* (Vol. 49, pp. 49–104). Academic Press. [https://doi.org/10.1016/S0079-7421\(08\)00002-9](https://doi.org/10.1016/S0079-7421(08)00002-9)
- Curtis, C. E., & D'Esposito, M. (2003). Persistent activity in the prefrontal cortex during working memory. In *Trends in Cognitive Sciences* (Vol. 7, Issue 9, pp. 415–423). Elsevier Ltd. [https://doi.org/10.1016/S1364-6613\(03\)00197-9](https://doi.org/10.1016/S1364-6613(03)00197-9)
- Esnaola-Acebes, J. M., Roxin, A., & Wimmer, K. (2021). Bump attractor dynamics underlying stimulus integration in perceptual estimation tasks. *BioRxiv*, 2021.03.15.434192. <https://doi.org/10.1101/2021.03.15.434192>
- Faisal, A. A., Selen, L. P. J., & Wolpert, D. M. (2008). Noise in the nervous system. In *Nature Reviews Neuroscience* (Vol. 9, Issue 4, pp. 292–303). Nature Publishing Group. <https://doi.org/10.1038/nrn2258>
- Funahashi, S., Bruce, C. J., & Goldman-Rakic, P. S. (1989). Mnemonic Coding of Visual Space in the Monkey's Dorsolateral Prefrontal Cortex. In *JOURNAL OF NEUROPHYSIOLOGY* (Vol. 6, Issue 2). [www.physiology.org/journal/jn](http://www.physiology.org/journal/jn)
- Gold, J. I., & Shadlen, M. N. (2007). The Neural Basis of Decision Making. *Annual Review of Neuroscience*, 30(1), 535–574. <https://doi.org/10.1146/annurev.neuro.29.051605.113038>
- Gold, J. I., & Stocker, A. A. (2017). Visual Decision-Making in an Uncertain and Dynamic World. In *Annual Review of Vision Science* (Vol. 3, pp. 227–250). Annual Reviews Inc. <https://doi.org/10.1146/annurev-vision-111815-114511>
- Heekeren, H. R., Marrett, S., Ruff, D. A., Bandettini, P. A., & Ungerleider, L. G. (2006). Involvement of human left dorsolateral prefrontal cortex in perceptual decision making is independent of response modality. *Proceedings of the National Academy of Sciences of the United States of America*, 103(26), 10023–10028. <https://doi.org/10.1073/pnas.0603949103>
- Heekeren, Hauke R., Marrett, S., & Ungerleider, L. G. (2008). The neural systems that mediate human perceptual decision making. In *Nature Reviews Neuroscience* (Vol. 9, Issue 6, pp. 467–479). Nature Publishing Group. <https://doi.org/10.1038/nrn2374>
- Kilpatrick, Z. P. (2018). Synaptic mechanisms of interference in working memory. *Scientific Reports*, 8(1), 1–20. <https://doi.org/10.1038/s41598-018-25958-9>
- Kilpatrick, Z. P., Ermentrout, B., & Doiron, B. (2013). Optimizing working memory with heterogeneity of recurrent cortical excitation. *The Journal of Neuroscience : The Official Journal of the Society for Neuroscience*, 33(48), 18999–19011. <https://doi.org/10.1523/JNEUROSCI.1641-13.2013>
- Kim, J. N., & Shadlen, M. N. (1999). Neural correlates of a decision in the dorsolateral prefrontal cortex

- of the macaque. *Nature Neuroscience*, 2(2), 176–185. <https://doi.org/10.1038/5739>
- Koyluoglu, O. O., Pertzov, Y., Manohar, S., Husain, M., & Fiete, I. R. (2017). Fundamental bound on the persistence and capacity of short-term memory stored as graded persistent activity. *ELife*, 6. <https://doi.org/10.7554/eLife.22225>
- Laing, C. R., & Chow, C. C. (2001). Stationary bumps in networks of spiking neurons. *Neural Computation*, 13(7), 1473–1494. <https://doi.org/10.1162/089976601750264974>
- Lin, Z., Nie, C., Zhang, Y., Chen, Y., & Yang, T. (2020). Evidence accumulation for value computation in the prefrontal cortex during decision making. *Proceedings of the National Academy of Sciences of the United States of America*, 117(48), 30728–30737. <https://doi.org/10.1073/pnas.2019077117>
- Liu, A. S. K., Tsunada, J., Gold, J. I., & Cohen, Y. E. (2015). Temporal integration of auditory information is invariant to temporal grouping cues. *ENeuro*, 2(2). <https://doi.org/10.1523/ENEURO.0077-14.2015>
- Macoveanu, J., Klingberg, T., Tegnér, J., Macoveanu, J., Tegnér, J., Klingberg, T., & Tegnér, J. (2007). Neuronal firing rates account for distractor effects on mnemonic accuracy in a visuo-spatial working memory task. *Biol Cybern*, 96, 407–419. <https://doi.org/10.1007/s00422-006-0139-8>
- Oberauer, K., Farrell, S., Jarrold, C., & Lewandowsky, S. (2016). What limits working memory capacity? *Psychological Bulletin*, 142(7), 758–799. <https://doi.org/10.1037/bul0000046>
- Panichello, M. F., DePasquale, B., Pillow, J. W., & Buschman, T. J. (2019). Error-correcting dynamics in visual working memory. *Nature Communications*, 10(1), 3366. <https://doi.org/10.1038/s41467-019-11298-3>
- Peirce, J., Gray, J. R., Simpson, S., MacAskill, M., Höchenberger, R., Sogo, H., Kastman, E., & Lindeløv, J. K. (2019). PsychoPy2: Experiments in behavior made easy. *Behavior Research Methods*, 51(1), 195–203. <https://doi.org/10.3758/s13428-018-01193-y>
- Philiastides, M. G., Aukstulewicz, R., Heekeren, H. R., & Blankenburg, F. (2011). Causal role of dorsolateral prefrontal cortex in human perceptual decision making. *Current Biology*, 21(11), 980–983. <https://doi.org/10.1016/j.cub.2011.04.034>
- Ploner, C. J., Gaymard, B., Rivaud, S., Agid, Y., & Pierrot-Deseilligny, C. (1998). Temporal limits of spatial working memory in humans. *European Journal of Neuroscience*, 10(2), 794–797. <https://doi.org/10.1046/j.1460-9568.1998.00101.x>
- Ratcliff, R., Smith, P. L., Brown, S. D., & McKoon, G. (2016). Diffusion Decision Model: Current Issues and History. In *Trends in Cognitive Sciences* (Vol. 20, Issue 4, pp. 260–281). Elsevier Ltd. <https://doi.org/10.1016/j.tics.2016.01.007>
- Riley, M. R., & Constantinidis, C. (2015). Role of Prefrontal Persistent Activity in Working Memory. *Frontiers in Systems Neuroscience*, 9, 181. <https://doi.org/10.3389/fnsys.2015.00181>
- Schneegans, S., & Bays, P. M. (2018). Drift in Neural Population Activity Causes Working Memory to Deteriorate Over Time. *The Journal of Neuroscience : The Official Journal of the Society for*

*Neuroscience*, 38(21), 4859–4869. <https://doi.org/10.1523/JNEUROSCI.3440-17.2018>

Shadlen, M. N. N., & Shohamy, D. (2016). Decision Making and Sequential Sampling from Memory. In *Neuron* (Vol. 90, Issue 5, pp. 927–939). Cell Press. <https://doi.org/10.1016/j.neuron.2016.04.036>

Shafi, M., Zhou, Y., Quintana, J., Chow, C., Fuster, J., & Bodner, M. (2007). Variability in neuronal activity in primate cortex during working memory tasks. *Neuroscience*, 146(3), 1082–1108. <https://doi.org/10.1016/J.NEUROSCIENCE.2006.12.072>

Summerfield, C., & Tsetsos, K. (2012). Building bridges between perceptual and economic decision-making: Neural and computational mechanisms. In *Frontiers in Neuroscience* (Vol. 6, Issue MAY). Front Neurosci. <https://doi.org/10.3389/fnins.2012.00070>

Takeda, K., & Funahashi, S. (2002). *Prefrontal Task-Related Activity Representing Visual Cue Location or Saccade Direction in Spatial Working Memory Tasks*. <https://doi.org/10.1152/jn.00249.2001>

Waskom, M. L., & Kiani, R. (2018). Decision Making through Integration of Sensory Evidence at Prolonged Timescales. *Current Biology*, 1–7. <https://doi.org/10.1016/j.cub.2018.10.021>

Wei, Z., Wang, X.-J., & Wang, D.-H. (2012). From Distributed Resources to Limited Slots in Multiple-Item Working Memory: A Spiking Network Model with Normalization. *Journal of Neuroscience*, 32(33), 11228–11240. <https://doi.org/10.1523/JNEUROSCI.0735-12.2012>

White, J. M., Sparks, D. L., & Stanford, T. R. (1994). Saccades to remembered target locations: an analysis of systematic and variable errors. *Vision Research*, 34(1), 79–92. [https://doi.org/10.1016/0042-6989\(94\)90259-3](https://doi.org/10.1016/0042-6989(94)90259-3)

Wimmer, K., Nykamp, D. Q., Constantinidis, C., & Compte, A. (2014). Bump attractor dynamics in prefrontal cortex explains behavioral precision in spatial working memory. *Nature Neuroscience*, 17(3), 431–439. <https://doi.org/10.1038/nn.3645>



## Supplemental Figures

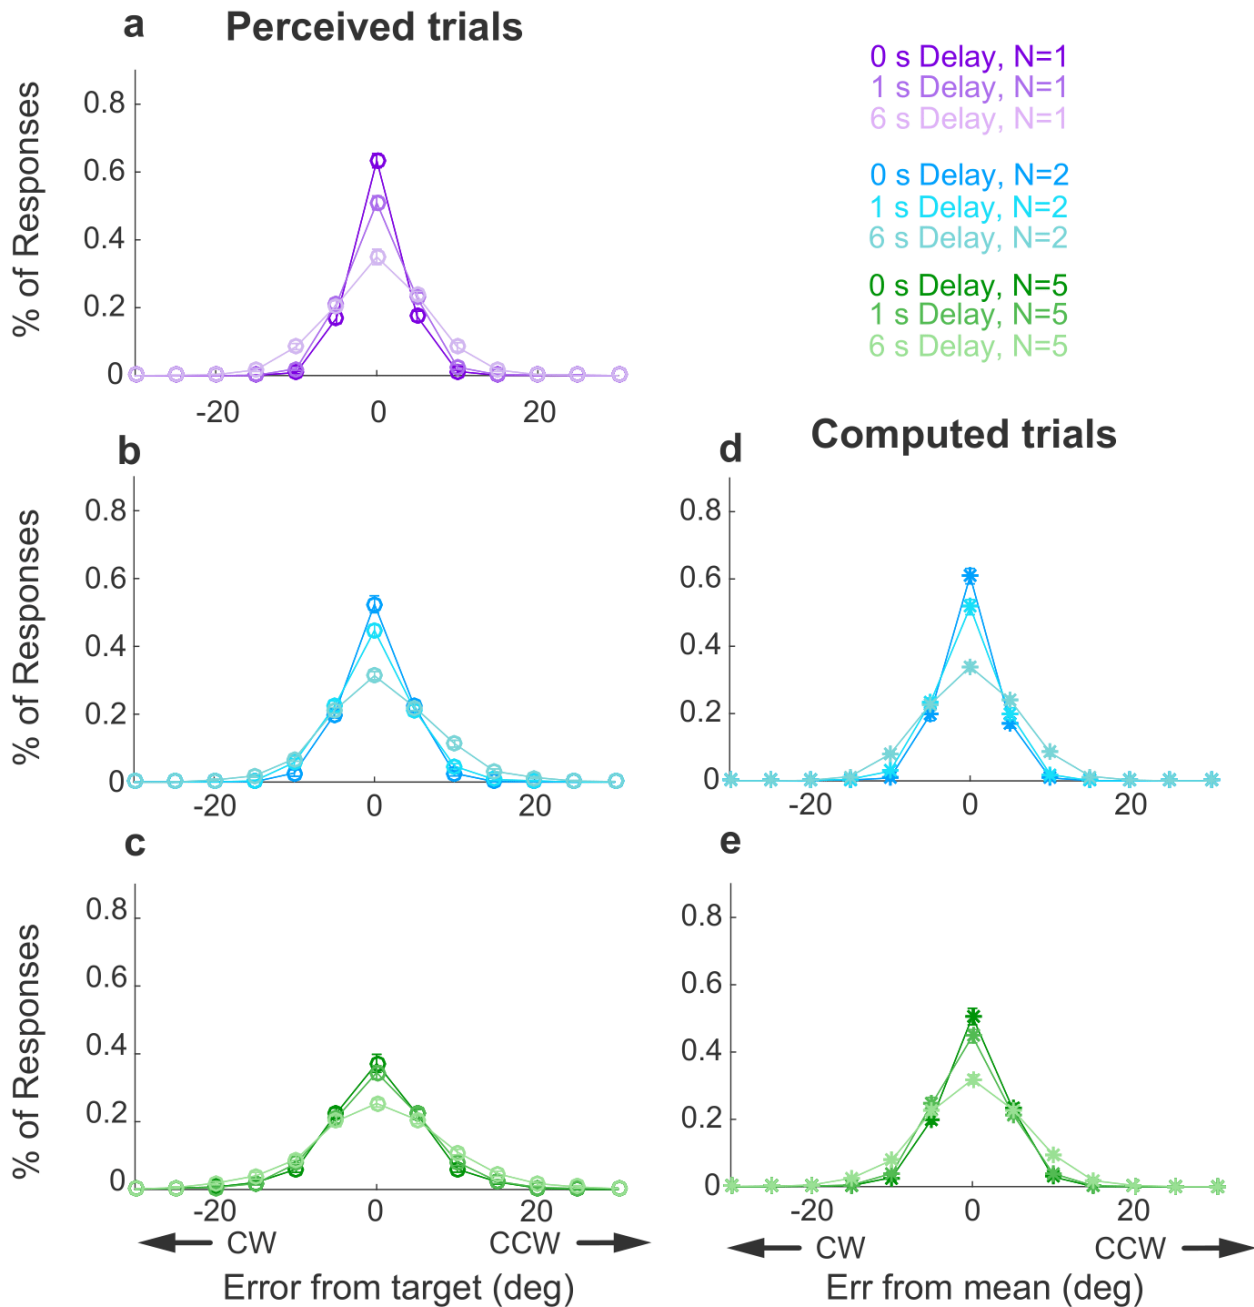

**Supplemental Figure S1:** Full error distributions in Simultaneous conditions. Each panel shows a histogram of mean error for different delays (colors, as indicated) for Perceived trials (left column: **a**) set size=1; **b**) set size=2; **c**) set size=5) and for Computed trials (right column; **d**) set size=2; **e**) set size=5). In each panel, points and error bars are mean $\pm$ SEM across all participants. Note that in all cases, 95% of the distributions fall between  $-30^\circ$  and  $30^\circ$ , justifying our exclusion of larger errors as off-target responses.

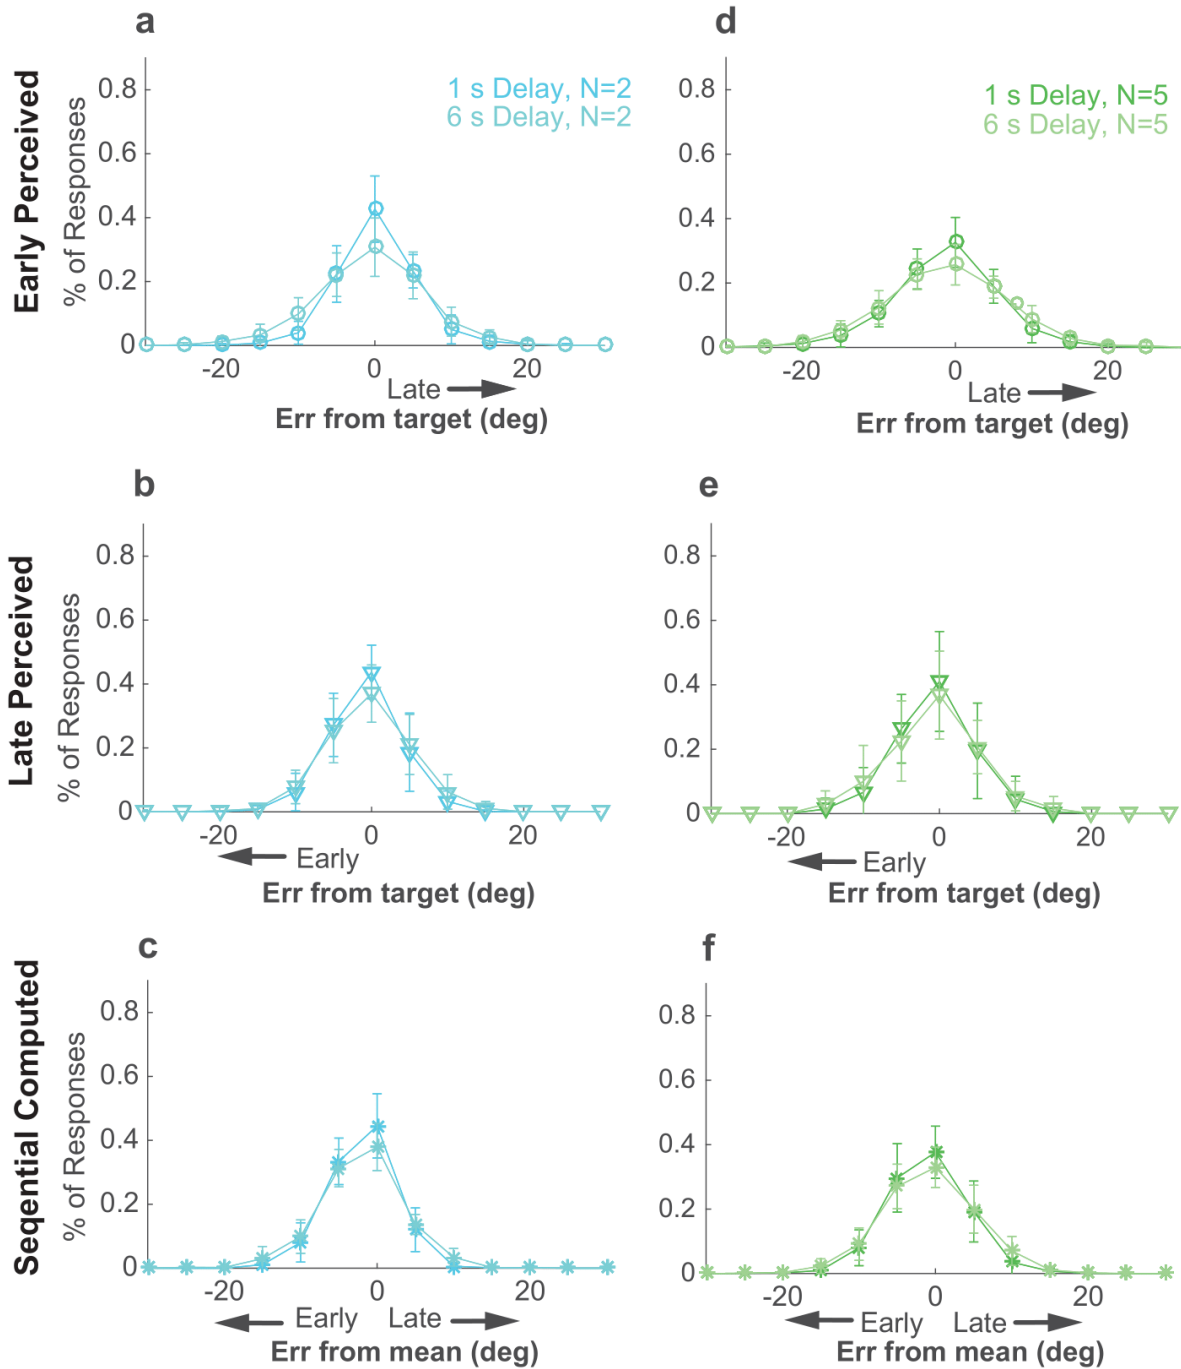

**Supplemental Figure S2:** Full error distributions in Sequential conditions. **a)** Histogram of mean Early Perceptual error for different delays for set size 2. **b)** Histogram of mean Late Perceptual error for different delays for set size 2. **c)** Histogram of mean Computed error for different delays for set size 2. **d-f)** As in **a-c** but for set size 5. In each panel, points and error bars are mean $\pm$ SEM across participants. Note that in all cases, 95% of the distributions fall between  $-30^\circ$  and  $30^\circ$ , justifying our exclusion of larger errors as off-target responses.

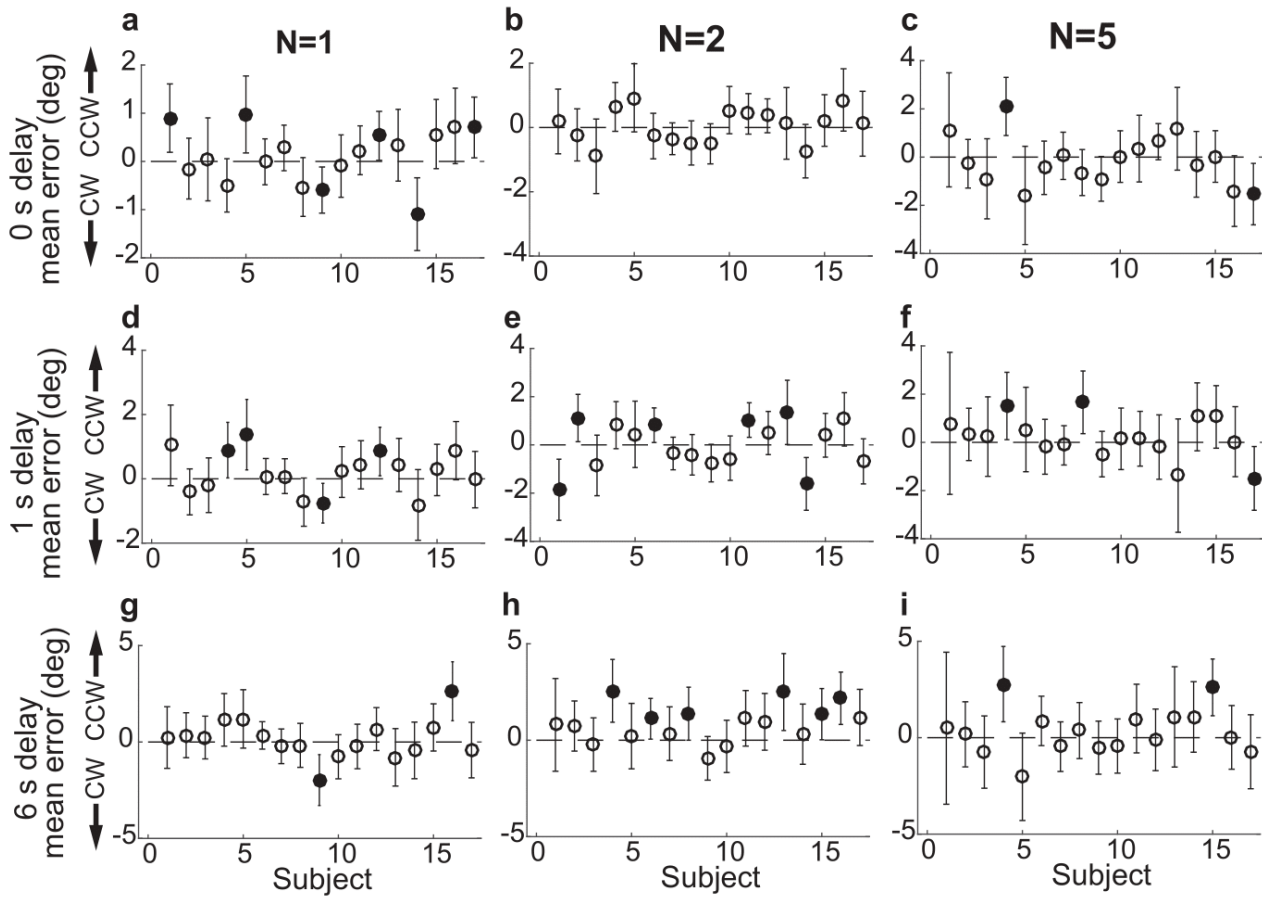

**Supplemental Figure S3:** Subject-wise mean response error in the Simultaneous Perceived condition. **a)** Delay=0 s, set size=1. **b)** Delay=0, set size=2. **c)** Delay=0 s, set size=5. **d-f)** as in **a-c** but for delay of 1 s. **g-i)** as in **a-c** but for delay of 6 s. In all panels, errorbars are  $\pm 95\%$  confidence intervals. Filled points indicate that 0 is not included in the confidence interval; i.e., there is bias in subject errors.

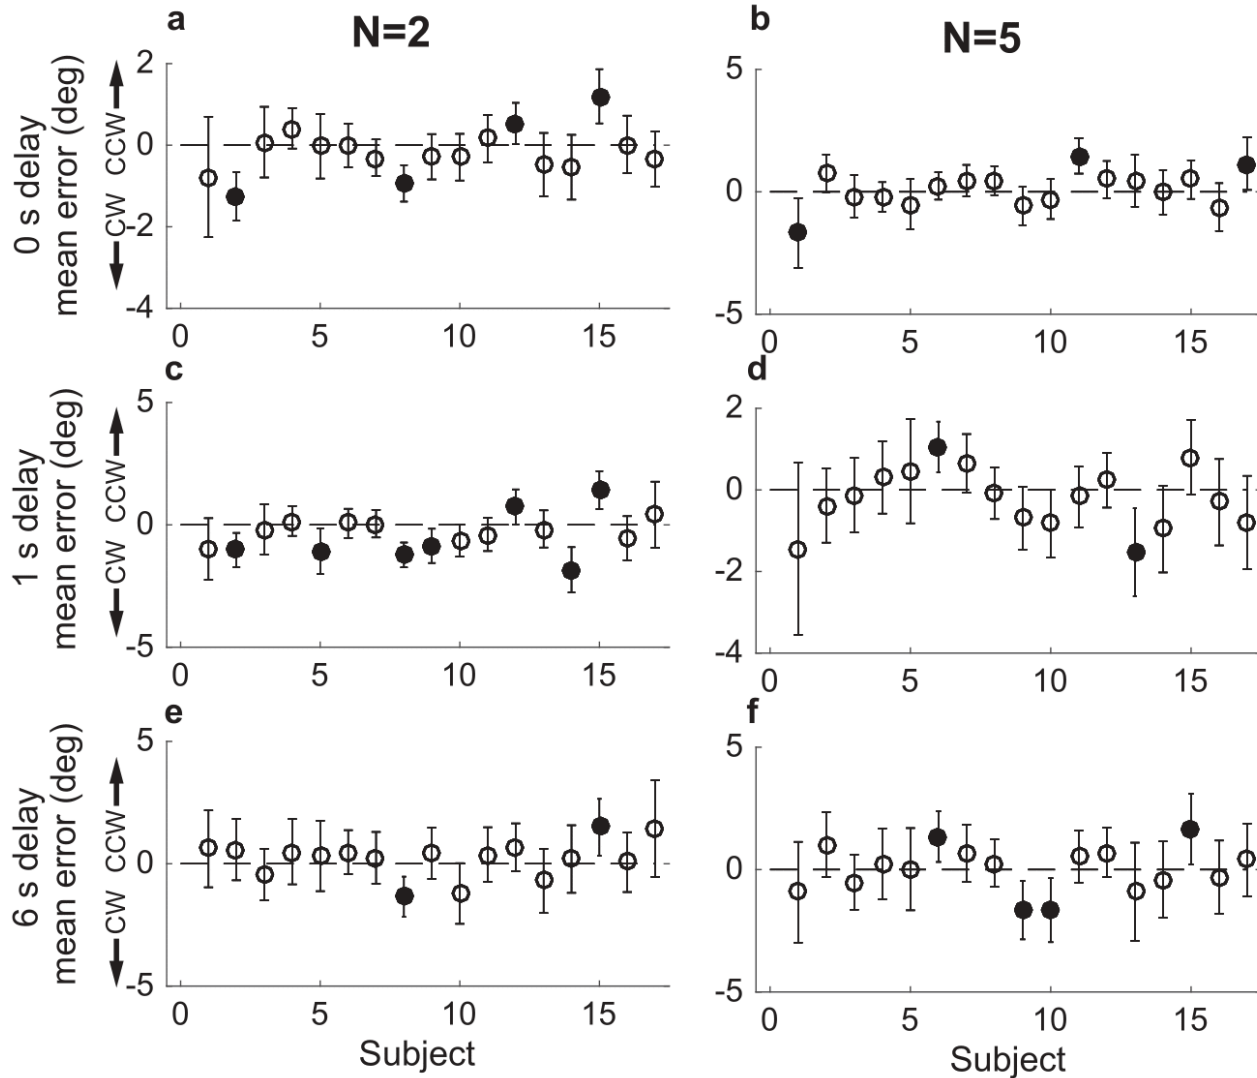

**Supplemental Figure S4:** Subject-wise mean error in the Simultaneous Computed condition. **a)** Delay=0 s, set size=2. **b)** Delay of 0, set size=5. **c–d)** as in **a–b** but for delay of 1 s. **e–f)** as in **a–b** but for delay of 6 s. In all panels, errorbars are  $\pm 95\%$  confidence intervals. Filled points indicate that 0 is not included in the confidence interval; i.e., there is bias in subject errors.

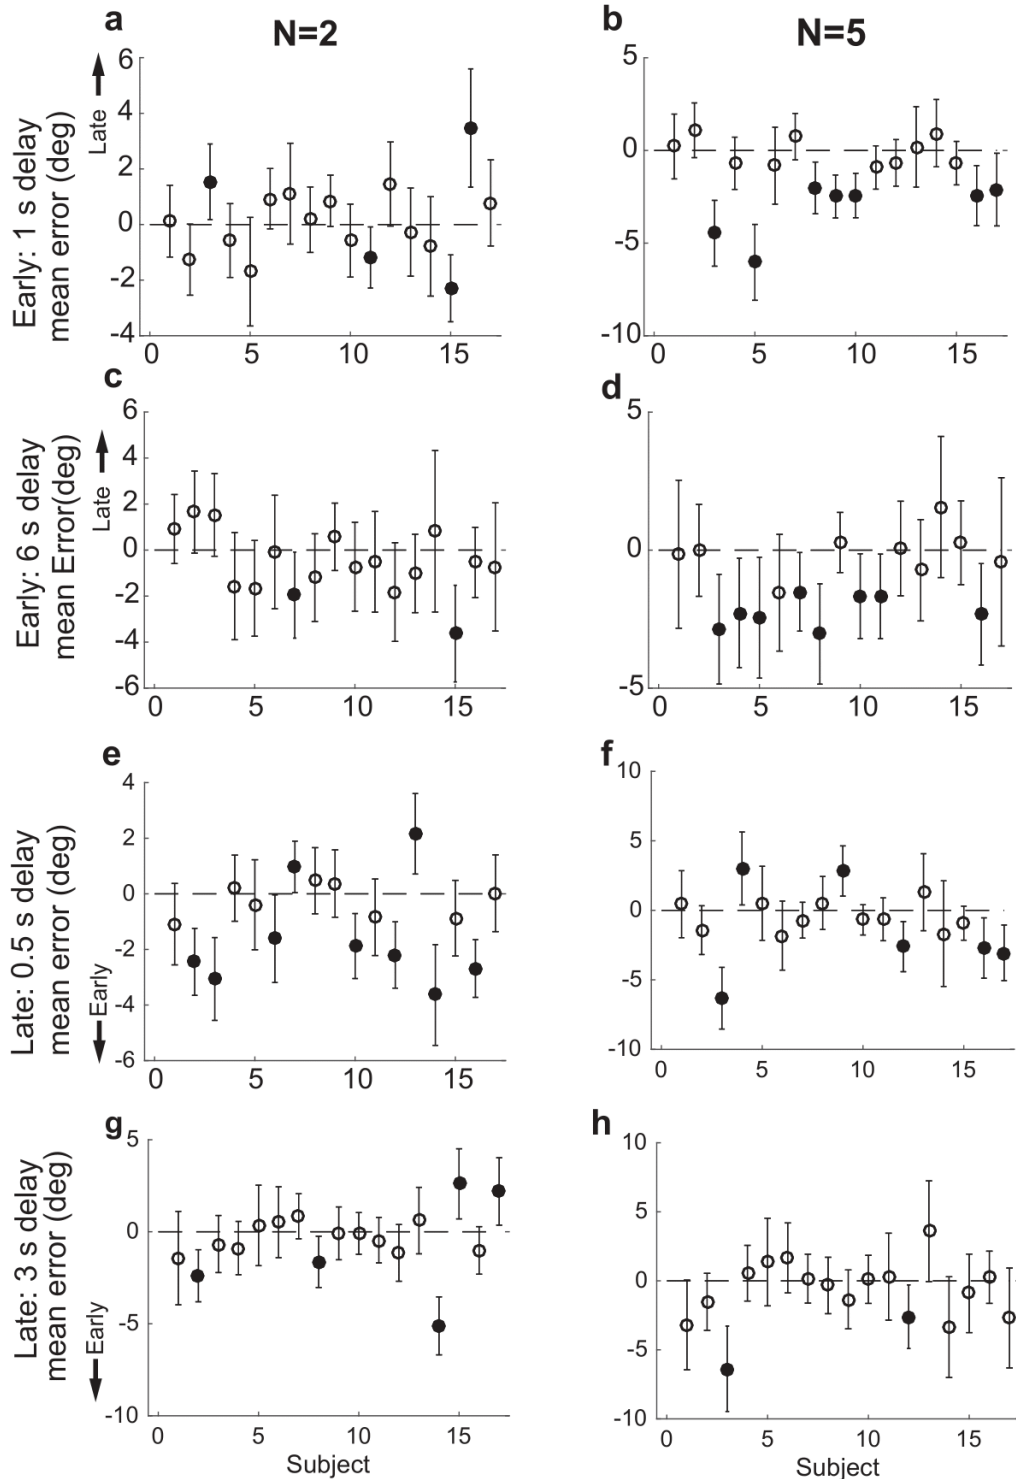

**Supplemental Figure S5:** Subject-wise mean error in the Sequential Perceived condition. **a)** Delay=1 s, set size=2 for Early samples. **b)** Delay=1, set size=5 for Early samples. **c-d)** as in **a-b** but for delay of 6 s. **e)** Delay=0.5 s, set size=2 for Late samples. **f)** Delay=0.5 s, set size=5 for Late samples. **g-h)** as in **e-f** but for delay of 3 s. In all panels, errorbars are  $\pm 95\%$  confidence intervals. Filled points indicate that 0 is not included in the confidence interval; i.e., there is bias in subject errors.

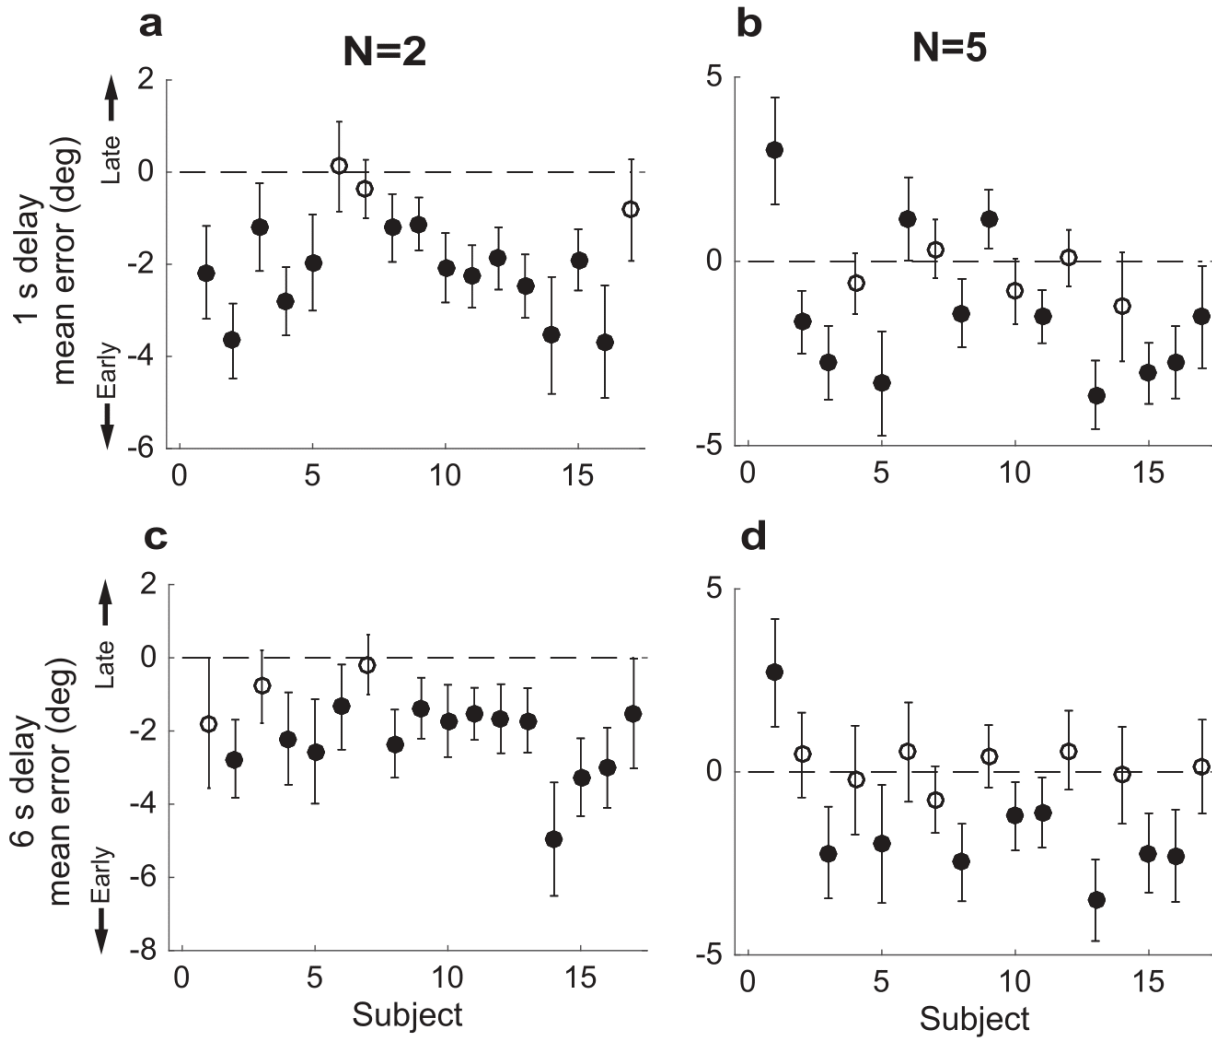

**Supplemental Figure S6:** Subject-wise mean error in the Sequential Computed condition. **a)** Delay=1 s, set size=2. **b)** Delay=1, set size=5. **c-d)** as in **a-b** but for delay of 6 s. In all panels, errorbars are  $\pm 95\%$  confidence intervals. Filled points indicate that 0 is not included in the confidence interval; i.e., there is bias in subject errors (which in this case tended to be towards the mean computed from the early points).

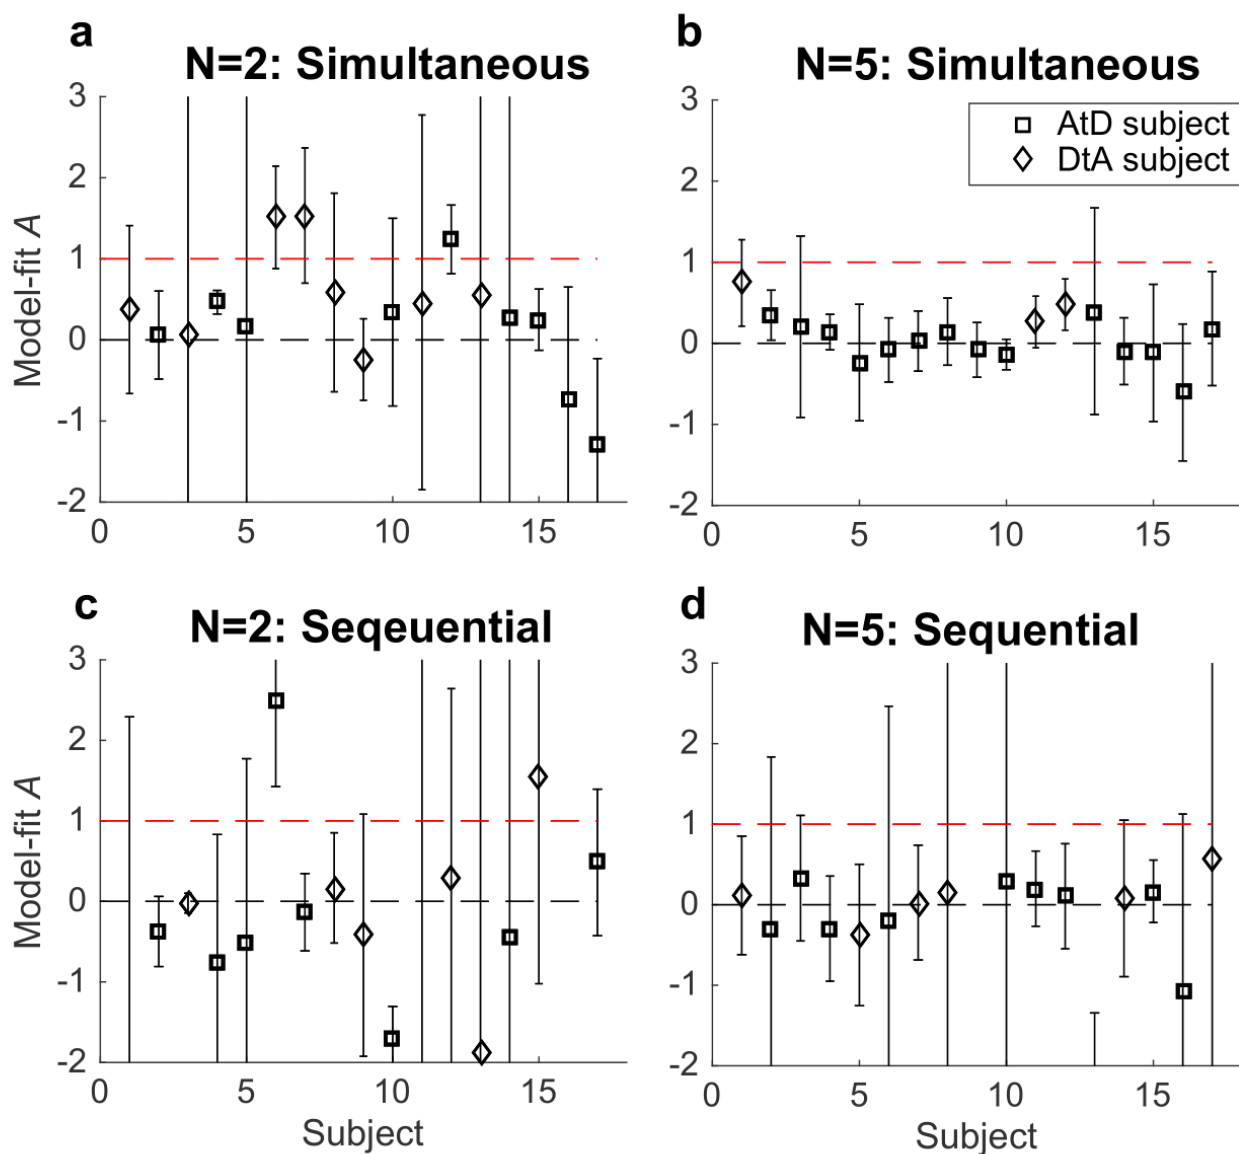

**Supplemental Figure S7:** Subject-based estimates of  $A$ . **a,b**) Simultaneous condition. **a**) Model-fits for  $A$  for AtD (square) and DtA (diamond) participants at set size 2. **b**) Model-fits for  $A$  for all participants at set size 5. **c,d**) Same as **a,b** but for the Sequential condition. In all panels, errorbars are  $\pm 95\%$  confidence intervals based on the Hessian computed during model fitting. Note that  $A=0$  implies no difference between the diffusion constant for a single and  $N$  points, whereas  $A=1$  implies that the variance and diffusion constant relationship predictions of the AtD and DtA models are equal and thus the models cannot be distinguished from each other.

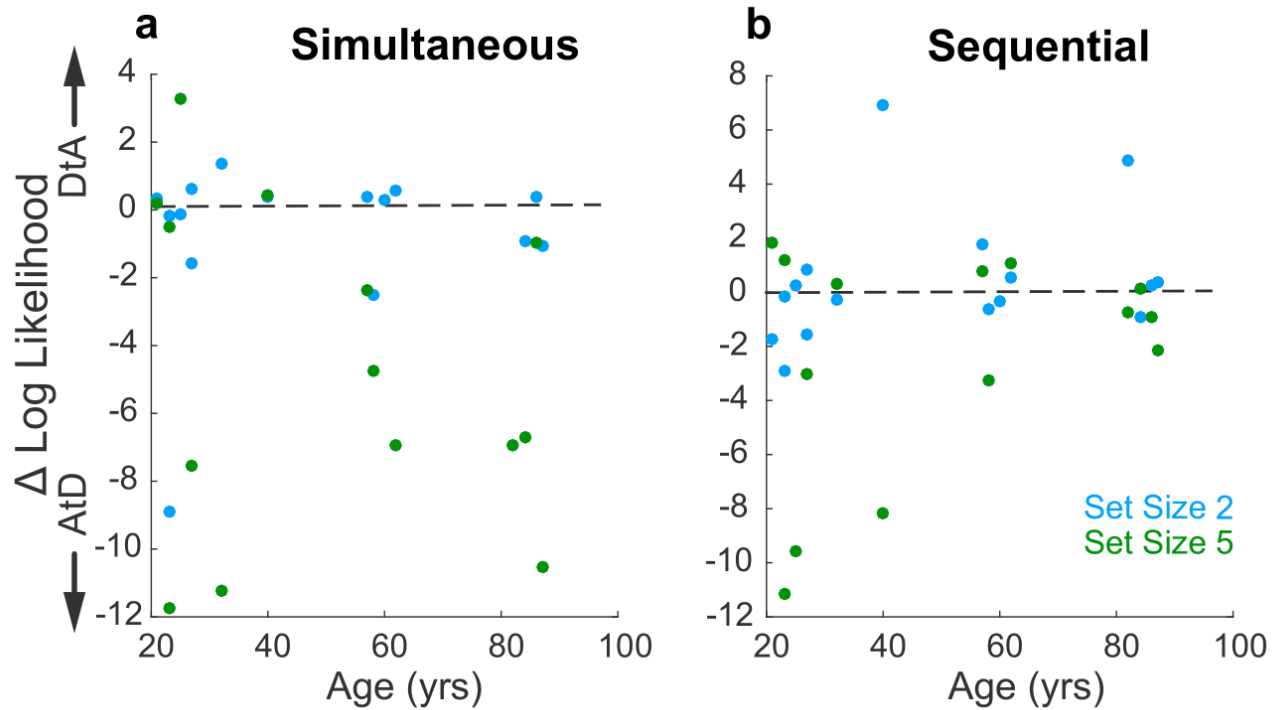

**Supplemental Figure S8:** Relationship between log likelihood difference for the two strategies and age. **a)** Log likelihood comparison for AtD and DtA (negative favors AtD) for set sizes 2 and 5 under Simultaneous conditions is not dependent upon age (correlation,  $p_s > 0.20$  computed separately for each set size). **b)** Same as in A, but for the Sequential Conditions ( $p_s > 0.20$ ).
